# Supplementary material
Source: publisher figshare collection journal article supplement (https://tandf.figshare.com/ndownloader/files/15279500)
Supplement: Supplementary file 1 [file 15279500]

**SUPPLEMENTAL DATA**

**Pleistocene sloth and hyena coprolite localities**

1. **USA**: Aden Crater (Lull, 1929; Eames, 1930), Bechan Cave (Meda et al., 1984, 1986), Carlsbad Caverns (Hunt et al., 2012b), Cowboy Cave (Hansen, 1980), Dust Cave (Santucci et al., 2001), Gypsum Cave (Laudermilk and Munz, 1934; Poinar et al., 1998; Hofreiter et al., 2000), Lower Sloth Cave (Logan, 1977; Spaulding and Martin, 1979), Muav Caves (Laudermilk and Munz, 1938; Long and Martin, 1974; Long et al., 1974), Rampart Cave (Laudermilk and Munz, 1938: Martin et al., 1961; Hansen, 1978), Shelter Cave (Thompson et al., 1980), Upper Sloth Cave (Logan and Black, 1979; Spaulding and Martin, 1979), Williams Cave (Spaulding and Martin, 1979).
2. **Cuba**: Ciego Montero (Antúnez and Suárez, 2013), Quemado de Güines (Antúnez and Suárez, 2013), Solapa del *Megalocnus* (Arredondo and Villavicencio, 2004).
3. **Peru**: Pikimachay Cave (Borrero, 2009).
4. **Brazil**: Lapa Vermelha IV (Lamig-Emperaire et al., 1975), Gruta de Brejoes (Czaplewski and Carlette, 1998).
5. **Argentina**: Peñas de las Trampas 1.1 (Martinez et al., 2004), Cueva Cacao 1A (Martinez et al., 2004), Gruta del Indio (Lagiglia, 1968; Carretero et al., 2013), Cuchillo Curá (Hofreiter et al., 2003), Cerro Casa de Piedra 7 (Velázquez et al., 2015).
6. **Chile**: Cueva del Milodón (Hauthal et al., 1999; Borrero and Martin, 2012; Hunt and Lucas, 2018).
7. **Ireland**: Castlepook Cave (Scharff et al., 1918).
8. **United Kingdom**: Bacon Hole Cave (Stringer, 1977), Coygan Cave (Jones, 1882), Eel Point (Schulting et al., 2005), Grays Thurrock (Dawkins, 1867), Happisburgh 3 (Parfitt and Larkin, 2010; Lewis, 2011b), Hyaena Den [Wookey Hole](Dawkins 1862, 1863; Jacobi and Hawkes, 1993; Tratman et al., 1971; White and Pettit, 2011; Balch, 1947; Jacobi et al., 2006), Kent’s Cavern (Lister, 2001), Kirkdale Cave (Buckland, 1822, 1824; Hunt et al., 2012a), Little Oakley (Lister et al., 1990), Lynford (Shreve, 2006; Smith, 2012; Shreve et al., 2012), Mother Grundy’s Parlour (Armstrong, 1925), Pin Hole Cave (Lewis, 2010, 2011b; Currant and Jacobi, 2001), Robin Hood Cave (Hedges et al., 1998), Spritsail Tor (Falconer, 1860), Tornewton Cave (Lewis, 2010, 2011b), Underwood Quarry (Donovan, 1988), Victoria Cave (Lewis, 2011a; O’Connor and Lord, 2013), Westbury-sub-Mendip (MacPhail and Goldberg, 1999), West Runton Freshwater Beds (Stuart, 1996; Larkin et al., 2000; Parfitt and Larkin, 2010; Stuart and Larkin, 2010 Lewis, 2010, 2011a), Yealm-Bridge Cavern (Pengelly, 1877).
9. Netherlands: Hogebroek (Brewer and Schouwenburg, 2009), Maasvlakte 2 (Borst et al., 2014), Oosterschelde (Mol and Vos, 1995).
10. **Belgium**: Goyet (Germonpré and Sablin, 2001).
11. **France**: Andone (Argant and Philippe, 2011), Bois Roche cave (Villa and Bartram, 1996; Goldberg, 2001; Marra et al., 2004; Blain and Villa, 2006; Villa et al., 2004, 2010; Dusseldorp, 2011; Williams et al 2018),, Camiac (Guadelli et al., 1988; Guadelli, 1989; Discamps et al., 2012; Dusseldorp, 2009, 2011), Ceyssaguet (Argent and Bonifay, 2011), Châtelperron (Vivent, 1989), Coumère Cave (Bon, 2011; Bon et al., 2012), Fouvent-Saint-Andoche (Fourvel et al., 2015), Grotte aux Ours (Pautret-Homerville et al., 2011; Palacio et al., 2017), Grotte Bourgeois-Delaunay (Bertran, 1999), Grotte de Bourdette (Discamps et al., 2012), Grotte de Peyre I/II (Rouquette, 1968; Fourvel et al., 2012), Grotte des deux Ouvertures (Argant and Philippe, 2011), Grotte du Bison (Enloe, 2012a, b), La Chauverie (Discamps et al., 2012; Dietrich, 2012d), La Grotte d’Unikoté (Michel, 2005), Le réseau Salomé (Fourvel et al., 2017), Les Auzières 2 (Marchal et al., 2009), Les Plumettes (Beauval and Morin, 2010), L’Igue des Rameaux (Rouzaud et al., 1990; Jeannet and Mein, 2016), Lunel-viel (Buckland, 1827; Fosse, 1996), Marillac (Maureille et al., 2017), Morancourt (Fosse, 1997; Mouton and Joffroy, 1948), Nerons Cave (Heslop, 2006), Port-la-Nouvelle (Lartigot‑Campin **and** Mone, 2017), Rochelot (Tournepiche and Couture, 1999), Rochers-de-Villaneuve (Beauval, et al., 2006; Beauval and Morin, 2010), Saint-Hippolyte (Vivent, 1989), Saint Vallier (Argant and Philippe, 2011), Tournal Cave (Magniez, 2009), Tourville la Riviere (Carpentier and Huault, 1984).
12. **Spain**: Abric Romaní (Burjachs, 2002; Vallverdú-Poch, et al., 2012), Arbreda Cave (Maroto et al., 1996), Arlanpe (Rios-Garaizar, et al., 2011), Ambrona (Klein, 1987), Barranc del la Boella (Vallverdú et al. 2014), Castillo Cave (Cabrera et al., 2004), Cova del Coll Verdaguer (Sanz et al., 2016; Sanz and Daura, 2018), Cova del Gegant (Carro and Martínez-Moreno, 2014), Cova Negra (Pérez Ripoll, 1977; Villaverde et al., 2014), Cova del Rinoceront (Daura et al., 2015), Cueva de la Zarzamora (Sala et al., 2011), Cueva de los Huesos (Cuenca-Bescós et al., 2010), Cueva del Búho (Iñigo et al., 1998), Cueva del Grajo II (Riquelme et al., 2004), Cueva del Camino (Arsuaga et al., 2012; Baquedano et al., 2014), Cueva de Nerja (Tortosa et al., 2002; Arribas et al., 2004a; Jordá et al. 2011), Cueva Victoria (Gibert et al., 1995, 2016), El Mirón Cave (Straus et al., 2011), Fuente Nueva-3 (Barsky et al., 2010; Duval et al., 2012; Espigares, et al 2013), Gabasa Cave (González-Sampériz et al., 2003), Gabasa 1 (Blasco Sancho and Montes 1997; González-Sampériz et al., 2003, 2005), Gran Dolina site (Blasco et al., 2011; Allué, et al 2015; Pineda et al., 2017; Duval et al 2018; Mosquera et al., 2018), Labeko Koba IX (Arrizabalaga et al., 2000; Villaluenga et al., 2012), La Mina (Pineda et al., 2017), La Parte (Álvarez-Lao and García, 2006), Las Ventanas cave (Carrión et al. 2001), La Valiña cave (Fernández-Rodríguez et al., 1995), Llonin Cave (Sanchis et al., 2018), Los Aprendices Cave (Sauqué et al., 2017), Los Torrejónes (Carrión et al. 2007; Lewis, 2011b), Orce (Gibert et al., 1988), Terrasses de la Riera dels Canyars (Daura et al., 2013; Rosado-Méndez et al., 2015), Teixoneres Cave (Ardèvol, et al., 2010, Talamo et al., 2016), Torralba (Klein, 1987), Vallparadís (Carrión et al., 2009; Garcia et al., 2012; Madurell-Malapeira et al., 2017), Venta Micena (Arribas and Palmqvist, 1998), Villacastín (Carrión et al., 2007).
13. **Portugal**: Gruta do Caldeirão (Hedges et al., 1991; Davis, 2002; Davis et al., 2007), Gruta da Oliveira (Zilhão, 2001; Zilhão et al., 2010), Pego do Diabo cave (Valente, 2004), Várzea de Loures (Neto de Carvalho and Farinha, 2006).
14. **Gibraltar**: Gorham's Cave (Carrión et al., 2008).
15. **Morocco**: Contrebandiers Cave (Goldberg and Aldeias, 2018), El Harhoura 2 Cave (Steele, 2012; Campmas et al. 2017), Grotte à Hominidés (Daujeard et al., 2012), Grotte des Rhinocéros (Daujeard et al., 2012), Jebel Irhoud (Richter et al., 2017), Mugharet el ‘Aliya Cave (Steele, 2012), Zourah Cave/El Harhoura 1 (Monchot and Aouraghe, 2009; Steele, 2012).
16. **Germany**: Aufhausener Cave (Diedrich 2008), Bad Wildungen-Biedensteg (Diedrich, 2006a,b, 2013b, 2014b), Berling Quarry (Diedrich, 2012c), Hohlenstein-Stadel (Kitagawa, 2014), Ilsenhöhle (Müller-BecK 2004; Diedrich, 2015), Lindenthaler Hyänenhöhle (Liebe, 1876), Morschen-Konnefeld (Keller and Försterling, 2002; Diedrich 2006a, b), Neumark-Nord Lake 1 (Diedrich 2012d, 2014a,b), Pfefferburg Cave (Diedrich, 2012d, 2014b), Schöningen Lake (Diedrich and McFarlane, 2017), Siegsdorf (Ziegler, 1994; Diedrich, 2012d, 2014b), Untermassfeld (Kahlke and Gaudzinski, 2005; Mazza and Bertini, 2013; Landeck and Garriga 2016), Westeregeln (Diedrich, 2012c, 2014b).
17. **Czech Republic**: Koněprusy Cave (Diedrich and Žák, 2006; Diedrich 2012b, 2014b), Nicová Cave (Diedrich, 2012a), Sipka Cave (Diedrich, 2012a), Sloup Cave (Diedrich, 2009, 2012a), Srbsko Chlum-Komín Cave (Diedrich and Žák, 2006; Diedrich, 2011b, 2014b), Sveduv Stůl Cave (Musil, 1962; Diedrich 2012a), Tmaň Axamitosa Brána Cave (Diedrich and Žák, 2006), Turská Maštal Cave (Diedrich and Žák, 2006).
18. **Austria**: Badel Cave (Unger, 1838; Diedrich, 2011a).
19. **Poland**: Bisńik Cave (Marciszak and Stephaniak 2010; Marciszak, et al., 2011).
20. **Italy**: Cava Muracci (Gatta et al., 2016: Gatta and Rolfo, 2017), Costa San Gia Como (Ferreira et al., 1993), Ficoncella Site (Aureli et al., 2015), Fontana Acetosa (Ferreira et al., 1993), Grotta del Capriolo (Ghezzo et al., 2014), Grotta del Fosselone (Ferreira et al., 1993), Grotta di Maccagnone (Evans, 1860), Grotta Grande (Ronchitelli et al., 2008), Grotta Guattari (White and Toth, 1991; Ferreira et al., 1993), Grotta Paglicci (Boscato and Crezzini, 2005), Gruta de Santi (Nunes, 2015), Montemerano – Manciano (Petronio et al., 2014), San Teodoro Cave (Bonfilglio et al., 2001; Marra et al. 2004; Mangano and Bonfiglio, 2005; Mangano et., 2005; Yll et al., 2006; Mangano, 2011; Nunes, 2015), Saticula (Ermolli et al., 2011), Tana delle Iene (Petrucci et al., 2005; Gatta et al., 2016), Zà Minica Cave (Pavia, 2007).
21. **Croatia**: Mujina Pećina (Pičuljan et al., 2013; Gerometta, 2017), Romualdova Pećina (Gerometta, 2017), Velika Pećina-Kličevica (Gerometta, 2017).
22. **Montenegro**: Trlica (Argant and Dimitrijević, 2007; van der Made and Dimitrijević, 2015).
23. **Serbia**: Baranica Cave (Argant and Dimitrijević, 2007; Bogićević et al., 2012), Pešturina Cave (Majkić et al., 2018).
24. **Bulgaria**: Magura Cave (Ivanova et al., 2016).
25. **Greece**: Agios Georgios-Kilkis Cave (Pappa et al., 2005), Lousikka (Athanassiou, 2012), Petralona Cave (Baryshnikov and Tsoukala, 2010), Pikermi (Mitzopoulos and Zapfe, 1963).
26. **Ukraine**: Bukovynka Cave (Ridush, 1999, 2004, 2009; Gerasimenko et al., 2018).
27. **Georgia**: Dmanisi (Vekua, 1995; Coil, 2011; Ferring et al., 2011; Tappen et al., 2002; Tappen, 2013).
28. **Turkey**: Karain Cave (Esin and Benedict, 1963).
29. **Syria**: Latamme (Hooijer, 1961).
30. **Israel**: Ben Tal Cave B (Horwitz and Goldberg, 1989), Kebara Cave (Horwitz and Goldberg, 1989; Speth and Tchernov, 2002; Goldberg et al., 2007), Manot Cave (Marder et al 2013), Qafzeh Cave (Rabinovich et al 2004), Quesem Cave (Stiner et al., 2009, 2011), 'Ubeidiya Formation (Gaudzinski, 2004).
31. **Russia**: Barakaevskaya Cave (Baryshnikov and Hoffecker, 1994; Lubin et al., 2002), Denisova Cave (Baryshnikov, 1999; Derevianko, et al., 2005), Geographical Society Cave (Baryshnikov, 2014), Logovo Gieny (Turner et al., 2013), Muhkai II (Amirkhanov et al. 2014, 2016), Okladnikov (Turner et al., 2013), Razboinich’ya Cave (Ovodov et al., 2011; Turner, 2010; Turner et al., 2013).
32. **China**: Lingjing Site (Wang et al., 2015; Doyon et al., 2018), Nihowan village (Kao, 1962), Sanmen rapids (Chow, 1955), Xuchang Man Site (Wang et al., 2014), Zhoukoudian (Boaz et al., 2000; Wang and Sun, 2000; Goldberg et al., 2001).
33. **Pakistan**: Haro River Quarry (Perri et al., 2017), Locality 642 (Dennell et al., 2005).
34. **Iran:** Wezmeh Cave (Trinkaus et al., 2008; Djamali et al., 2011), Yafteh Cave (Mashkour et al., 2009).
35. **Saudi Arabia**: Ti’s al Ghadah (Stimpson et al., 2016).
36. **Eritrea**: Buia (Martínez-Navarro, et al., 2004; Ghinassi et al., 2015).
37. **Kenya**: Olduvai Gorge, FLK 1/FLKN 2 (Blumenshine, 1991; Leakey, 1971; Bunn, 1986).
38. **Zimbabwe**: Redcliff Cave (Klein, 1984; Scott et al., 2003).
39. **South Africa**: Boegoeberg 1 (Klein et al., 1999), Buffalo Cave (Herries et al., 2006), Cave of Hearths (Scott et al., 2003), Cooper’s D (Val et al., 2014), Cornelia-Uitzoek (Brink et al., 2012), Deipkloof Rock Shelter (Steele and Klein, 2013), Duinefontein 1 (Klein et al., 1999), Duinefontein 2 (Cruz-Uribe et al., 2003), Elandsfontein (Van Zinderen Bakker in Singer & Wymer, 1968; Klein and Cruz-Uribe 1991; Klein et al., 2007), Elandsfontein Bone Circle (Cruze-Uribe, 1991), Elandsfontein Hyena Den 2 (Cruz-Uribe, 1991), Equus Cave (Scott, 1987; Klein et al., 1991; Cruze-Uribe, 1991; Gil-Romera et al., 2014; Kuhn et al., 2016), Erfkroon (Churchill et al., 2000), Florisbad (Van Zinderen Bakker, 1989; Scott and Brink, 1992), Gladysvale cave (Backwell et al., 2009; Taru and Backwell, 2013; Taru, 2016), Hoedjiespunt 1 (Cruz-Uribe, 1991; Stynder, et al., 2001), Kromdraai (Fourvel et al., 2018), Makapansgat (Scott, 1995), Oyster Bay (Carrión et al., 2000), Plovers Lake (De Ruiter et al., 2008), Salpeterkop (Scott et al., 2003), Sea Harvest (Cruz-Uribe, 1991; Grine and Klein 1993), Swartklip 1 (Cruz-Uribe, 1991), X Cave (Van Zyl et al., 2016), Ysterfontein (Cruz-Uribe, 1991; Halkett et al., 2003).

**REFERENCES**

Allué, E., Cáceres, I., Expósito, I., Canals, A., Rodríguez, A., Rosell, J., Bermúdez de Castro, J. M. and Carbonell, E. 2015. *Celtis* remains from the Lower Pleistocene of Gran Dolina, Atapuerca (Burgos, Spain). *Journal of Archaeological Science*, 53: 570-577.

Álvarez-Lao DJ, García N. 2006. A new site from the Spanish Middle Pleistocene with cold-resistant faunal elements: La Parte (Asturias, Spain). *Quaternary International*, 142:107–118.

Amirkhanov, H.A., Ozherel’ev, D.V., Gribchenko, Y.N., Sablin, M.V., Semenov, V.V. and Trubikhin, V. 2014. Early Humans at the eastern gate of Europe: The discovery and investigation of Oldowan sites in northern Caucasus. *Comptes Rendus Palevol*, 13: 717-725.

Amirkhanov, H.A., Ozherelyev, D.V., Sablin, M.V. and Agadzhanyan, A.K. 2016. Faunal remains from the Oldowan site of Muhkai II in the North Caucasus: Potential for dating and palaeolandscape reconstruction. *Quaternary International*, 395: 233-241.

Antúnez, C.A. and Suárez, R.R. 2013. Evidencias directas de herbivorismo en coprolitos de perezosos extintos (Mammalia: Pilosa: Megalonychidae) de Cuba. *Revista del Jardín Botánico Nacional*, 34-35: 67-73.

Ardèvol, R.I., Blasco, R., Rivals, F., Chacôn, M.G., Menéndez, L., Morales, J.I., Rodriguez-Hidalgo, A., Cebri, A., Carbonell, E. and Serrat, D. 2010. A stop along the way: the role of Neanderthal groups at level III of Teixoneres cave (Moià, Barcelona, Spain). *Quaternaire. Revue de l'Association française pour l'étude du Quaternaire*, 21: 139-154.

Argant, J. and Bonifay, M.-F. 2011. Les coprolithes de hyène (*Pachycrocuta brevirostris*) de la couche 2 du site villafranchien de Ceyssaguet (Lavoûte-sur-Loire, Haute-Loire, France): analyse pollinique et indications paléoenvironnementales. *Quaternaire Revue de l'Association française pour l'étude du Quaternaire,* 22: 3-11.

Argant, J. and Dimitrijević, V. 2007. Pollen analyses of Pleistocene hyaena coprolites from Montenegro and Serbia. *Geoloski anali Balkanskoga poluostrva*, 68: 73-80.

Argant, J. and Philippe, M. 2011. L'analyse Pollinique Des Coprolithes: Un Outil Pour La Reconstruction Du Paleoenvironnement. *Quaternaire, Hors-série*, 4: 307-318

Armstrong, A.L. 1925. Excavations at Mother Grundy's Parlour, Creswell Crags, Derbyshire, 1924. *The Journal of the Royal Anthropological Institute of Great Britain and Ireland*, 55:146-175.

Arredondo, C. and Villavicencio, R. 2004. Tafonomía del depósito arqueológico Solapa del *Megalocnus* en el noroeste de Villa Clara, Cuba. *Revista Biología*, 18: 160-171.

Arribas, A. and Palmqvist, P. 1998. Taphonomy and paleoecology of an assemblage of large mammals: hyaenid activity in the Lower Pleistocene site at Venta Micena (Orce, Guadix-Baza Basin, Granada, Spain). *Geobios,* 31: 3-47.

Arribas, A., Aura, E., Carrión, J., Jordá, J.and Pérez Ripoll, M. 2004a. Presencia de hiena manchada en los depósitos basales (Pleistoceno Superior final) del yacimiento arqueológico de la Cueva de Nerja (Málaga, España). *Revista Española de Paleontología,* 19:109-121.

Arribas, A., Baeza, E., Bermúdez, D., Blanco, S., Durán, J.J., Garrido, G., Gumiel, J.C., Hernández, R., Soria, J.M. and Viseras, C. 2004b. Nuevos registros paleontológicos de grandes mamíferos en la Cuenca de Guadix-Baza (Granada),aportaciones del Proyecto Fonelas al conocimiento sobre las faunas continentales del Plioceno-Pleistoceno europeo. *Boletín Geológico y Minero,* 115: 567-581.

Arsuaga, J.L., Baquedano, E., Pérez-González, A., Sala, N., Quam, R.M., Rodríguez, L., García, R., García, N., Álvarez-Lao, D.J., Laplana, C. and Huguet, R. 2012. Understanding the ancient habitats of the last-interglacial (late MIS 5) Neanderthals of central Iberia: paleoenvironmental and taphonomic evidence from the Cueva del Camino (Spain) site. *Quaternary International*, 275: 55-75.

Athanassiou, A. 2012. A skeleton of Mammuthus trogontherii (Proboscidea, Elephantidae) from NW Peloponnese, Greece. *Quaternary International*, 255: 9-28.

Arrizabalaga A, Altuna J, Areso P. 2000. Labeko Koba (País Vasco): hienas y humanos en los albores del Paleolítico superior. *Sociedad de Ciencias “Aranzadi” Munibe*, 52: 392–394.

Aureli, D., Contardi, A., Giaccio, B., Jicha, B., Lemorini, C., Madonna, S., Magri, D., Marano, F., Milli, S., Modesti, V. and Palombo, M.R. 2015. Palaeoloxodon and human interaction: depositional setting, chronology and archaeology at the Middle Pleistocene Ficoncella site (Tarquinia, Italy). *PloS one*, *10*(4), p.e0124498.

Backwell, L., Pickering, R., Brothwell, D., Berger, L., Witcomb, M., Martill, D., Penkman, K. and Wilson, A. 2009. Probable human hair found in a fossil hyaena coprolite from Gladysvale cave, South Africa. *Journal of Archaeological Science*, 36:1269–1276.

Baquedano, E., Márquez, B., Laplana, C., Arsuaga, J. L, Pérez-González, A. 2014. The Archaeological sites at Pinilla del Valle (Madrid, Spain). *In* Ramos, R. S. (ed.), Pleistocene and Holocene hunter-gatherers in Iberia and the Gibraltar Strait: The current archaeological record: Burgos, Universidad de Burgos, 577-584.

Balch, H. E. 1947. Mendip: The great cave of Wookey Hole, 2nd Ed: Bristol, John Wright and Sons, 108 p.

Barsky, D., Celiberti, V., Cauche, D., Gregoire, S., Lebegue, F., De Lumley, H. and Toro-Moyano, I. 2010. Raw material discernment and technological aspects of the Barranco León and Fuente Nueva 3 stone assemblages (Orce southern Spain). *Quaternary International*, 223: 201-219.

Baryshnikov, G. 1999. Large mammals and Neanderthal paleoecology in the Altai Mountains (Central Asia, Russia). *Préhistoire Européenne,* 14:49-66.

Baryshnikov, G.F. 2014. Late Pleistocene hyena *Crocuta ultima ussurica* (Mammalia: Carnivora: Hyaenidae) from the Paleolithic site in Geographical Society Cave in the Russian far east. *Proceedings of the Zoological Institute Russian Academy of Science,* 318:197-225.

Baryshnikov, G. and Hoffecker, J.F. 1994. Mousterian hunters of the NW Caucasus: preliminary results of recent investigations. *Journal of Field Archaeology*, 21:1-14.

Baryshnikov, G.F. and Tsoukala, E. 2010. New analysis of the Pleistocene carnivores from Petralona Cave (Macedonia, Greece) based on the Collection of the Thessaloniki Aristotle University. *Geobios*, 43: 389-402.

Beauval, C., and Morin, E. 2010. Les repaires d’hyènes du Lussacois (Lussac-les-Châteaux, Vienne, France): Apport des sites des Plumettes et des Rochers-de-Villeneuve. *In* Buisson-Catil, J. and Primault, J. (eds.), Préhistoire entre Vienne et Charente. Hommes et sociétés du Paléolithique. Chauvigny, Association des Publications Chauvinoises. 175-190.

Beauval, C., Lacrampe-Cuyaubère, F., Maureille, B. and Trinkaus, E. 2006. Direct radiocarbon dating and stable isotopes of the Neandertal femur from Les Rochers-de-Villeneuve (Lussac-les-Châteaux, Vienne). *Bulletins et Memoires de la Societe d’Anthropologie de Paris*, 18: 35-42.

Bertran, P. 1999. Dynamique des dépôts de la grotte Bourgeois-Delaunay (La Chaise-de-Vouthon, Charente): apport de la micromorphologie/Depositional processes in the Bourgeois-Delaunay Cave (La Chaise-de-Vouthon, Charente, France): micromorphological approach. *Paléo, Revue d'Archéologie Préhistorique*, 11: 9-18.

Blain, H.A. and Villa, P. 2006. Amphibians and squamate reptiles from the early Upper Pleistocene of Bois Roche Cave (Charente, southwestern France). *Acta Zoologica Cracoviensia-Series A: Vertebrata*, 49:1-32.

Blasco, R., Rosell, J., van der Made, J., Rodríguez, J., Campeny, G., Arsuaga, J.L., de Castro, J.M.B. and Carbonell, E. 2011. Hiding to eat: the role of carnivores in the early Middle Pleistocene from the TD8 level of Gran Dolina (Sierra de Atapuerca, Burgos, Spain). *Journal of Archaeological Science*, 38: 3373-3386.

Blasco Sancho MF, Montes L. 1997. Los hiénidos del yacimiento Musteriense de Gabasa 1 (Huesca, España). *Bolskan,* 14:9–27.

Blumenschine, R.J. 1991. Hominid carnivory and foraging strategies, and the socio-economic function of early archaeological sites. *Phiosophical Transactions of the Ryal Society of London, Series B*, 334: 211-221.

Boaz, N.T., Ciochon, R.L., Xu, Q. and Liu, J. 2000. Large mammalian carnivores as a taphonomic factor in the bone accumulation at Zhoukoudian. *Acta Anthropologica Sinica*, 19: 224-234.

Bogićević, K., Nenadić, D. and Mihailović, D. 2012. Late Pleistocene voles (Arvicolinae, Rodentia) from the Baranica Cave (Serbia). *Geologica Carpathica*, *63*(1), pp.83-94.

Bon, C. 2011. Contribution de la Paléogénétique et de la Paléogénomique à l’étude des sites archéologiques. PhD thesis, Université Paris Sud-Paris XI), 236 p.

Bon, C., Berthonaud, V., Maksud, F., Labadie, K., Poulain, J., Artiguenave, F., Wincker, P., Aury, J.M. and Elalouf, J.M. 2012. Coprolites as a source of information on the genome and diet of the cave hyena. *Proceedings of the Royal Society of London, Series B*, doi:10.1098/rspb.2012.0358

Bonfiglio, L., Mangano, G., Marra, A.C. and Masini, F. 2011. A new late Pleistocene vertebrate faunal complex from Sicily (S. Teodoro Cave, North-Eastern Sicily, Italy). *Bollettino della Società Palaeontologica Italiana*, 40:149-158.

Borrero, L. A. 2009. The elusive evidence: The archeological record of the South American extinct megafauna. *In*: Haynes, G. (ed.), American megafaunal extinctions at the end of the Pleistocene. New York, Springer, 145-168.

Borrero, L.A. and Martin, F.M. 2012. Taphonomic observations on ground sloth bone and dung from Cueva del Milodón, Ultima Esperanza, Chile: 100 years of research history. *Quaternary International*, 278: 3-11.

Borst, W., Weerts, H., Vellinga, T. and Otte, A. 2014. Monitoring programme for the MV2, Part IV: Archeological and palaeontological finds. *Terra et Aqua,* 135: 1-12.

Boscato, P. and Crezzini, J. 2005. L’Uomo e la Iena macchiata. Tafonomia su resti di ungulati del Gravettiana antico di Grotta Paglicci (Rignano Garganico–FG). *In* Malerba, P. and Visentini, P. (eds.), Atti del 4° Convegno Nazionale di Archeozoologia (Pordenone, 13-15 novembre 2003). *Quaderni del Museo Archeologico del Friuli Occidentale*, 6: 67-74.

Brewer, J.G. and Schouwenburg, C. 2009. Carnivora from Salland. A last word from DP Bosscha Erdbrink. *Cranium*, 26: 13-18.

Brink, J.S., Herries, A.I., Moggi-Cecchi, J., Gowlett, J.A., Bousman, C.B., Hancox, J.P., Grün, R., Eisenmann, V., Adams, J.W. and Rossouw, L. 2012. First hominine remains from a∼ 1.0 million year old bone bed at Cornelia-Uitzoek, Free State Province, South Africa. *Journal of Human Evolution*, 63: 527-535.

Buckland, W. 1822. Account of an assemblage of fossil teeth and bones of elephant, rhinoceros, hippopotamus, bear, tiger and hyaena, and sixteen other animals; discovered in a cave at Kirkdale, Yorkshire, in the year 1821; with a comparative view of ﬁve similar caverns in various parts of England, and others on the continent. *Philosophical Transactions of the Royal Society of London,* 112: 171-236.

Buckland, W. 1824. Reliquiae diluvianae; or, observations on the organic remains contained in caves, ﬁssures, and diluvial gravel, and on other geological phenomena, attesting the action of an universal deluge. 2nd edition. London: J. Murray, 303 p.

Buckland, W. 1827. Observations on the bones of hyaenas and other animals on the cavern of Lunel near Montpelier, and in the adjacent strata of marine formation. *Proceedings of the Geological Society of London*, 1: 3-6.

Bunn, H. T. 1986. Patterns of skeletal representation and hominid subsistence activities at Olduvai Gorge, Tanzania and Koobi Fora, Kenya. *Journal of Human Evolution,* 15: 673-690.

Burjachs, F. 2002. Palinología. *In* Carbonell, E. (ed.), Abric Romaní, nivelI. Models d’ocupació de curta durada de fa 46.000 anys ala cinglera del Capelló (Capellades, Anoia, Barcelona) ragona. Univeritat Rovira i Virgili, Grup de Recerca d'Autoecologia Humana del Quaternari, 323.

Cabrera, V., Pike-Tay, A. and Bernaldo de Quirós, F. 2004. Trends in Middle Paleolithic settlement in Cantabrian Spain: The Late Mousterian at Castillo Cave. *In* Conard, N. (ed.), Settiement dynamics ol the Middie Paleolithic and Middie Stone Age, 2, Tübingen, Kems Verlag, 437-460.

Campmas, É., Michel, P., Costamagno, S., El Hajraoui, M.A. and Nespoulet, R. 2017. Which predators are responsible for faunal accumulations at the Late Pleistocene layers of El Harhoura 2 Cave (Témara, Morocco)?. *Comptes Rendus Palevol*, 16: 333-350.

Carpentier, G. and Huault, M.F. 1984. Analyse pollinique d’un coprolithe de hyene trouvé dans les formations alluviales saaliennes de Tourville la Riviere (Seine-Maritime). *Bulletin Centre de Géomorphorphologie*, 29: 49-55.

Carretero, E.M., Garcia, A. and Dacar, M. 2013. Paleoenvironmental reconstruction of central-western Argentina from analysis of Late-Pleistocene mammal droppings. *Journal of Arid Environments*, 97: 160-169.

Carrión, J.S., Brink, J.S., Scott, L. and Binneman, J.N.F. 2000. Palynology and palaeo-environment of Pleistocene hyaena coprolites from an open-air site at Oyster Bay, Eastern Cape coast, South Africa. *South African Journal of Science*, 96: 449-453.

Carrión, J.S., Riquelme, J.A., Navarro, C. and Munuera, M. 2001. Pollen in hyaena coprolites reflects late glacial landscape in southern Spain. *Palaeogeography, Palaeoclimatology, Palaeoecology*, 176: 193-205.

Carrión, J.S., Scott, L., Arribas, A., Fuentes, N., Gil, G. and Montoya, E. 2007. Pleistocene landscapes in central Iberia inferred from pollen analysis of hyena coprolites. *Journal of Quaternary Science,* 22:191-202.

Carrión, J.S., Finlayson, C., Finlayson, G., Allué, E., LópezSáez, J.A., López-García, P., Fernández, S., Gil, G., Fuentes, N. and González-Sampériz, P. 2008. A coastal reservoir of biodiversity for Upper Pleistocene human populations. Palaeoecological investigations in Gorham’s Cave (Gibraltar) in the context of the Iberian Peninsula. *Quaternary Science Reviews* 27: 2118-35.

Carrión, J.S., González-Sampériz, P., López Sáez, J.A., López García, P. and Dupré, M., 2009. Quaternary pollen analysis in the Iberian Peninsula: the value of negative results. Internet archaeology 25 p. 1-53 <http://intarch.ac.uk/journal/issue25/5/toc.html2>

Carro, S.C.S. and Martínez-Moreno, J. 2014. Who let the hyenas out? Taphonomic analysis of the faunal assemblage from GL-1 of Cova del Gegant (Sitges, Spain). *Quaternary International*, 330: 19-35.

Chow, M. M. 1955. Two specimens of mammalian coprolites from the Sanmen Rapids, Shanshi and Singtsai, Honan. *Acta Paleontologica Sinica*, 3: 283-286.

Churchill, S.E., Brink, J.S., Berger, L.R., Hutchison, R.A., Rossouw, L., Stynder, D., Hancox, P.J., Brandt, D., Woodborne, S., Loock, J.C. and Scott, L. 2000. Erfkroon: a new Florisian fossil locality from fluvial contexts in the western Free State, South Africa. *South African Journal of Science,* 96: 161-163.

Coil, R. A. 2011. Spatial analysis of the faunal assemblage at Dmanisi, Georgia: A look at spatial analysis methods in theory and in practice. MA Thesis, Minneapolis, University of Minnesota, 112 p.

Cruz-Uribe, K. 1991. Distinguishing hyena from hominid bone accumulations. *Journal of Field Archaeology*, 18: 467-486.

Cruz-Uribe, K., Klein, R.G., Avery, G., Avery, M., Halkett, D., Hart, T., Milo, R.G., Sampson, C.G. and Volman, T.P. 2003. Excavation of buried late Acheulean (mid-quaternary) land surfaces at Duinefontein 2, Western Cape Province, South Africa. *Journal of Archaeological Science*, 30: 559-575.

Cuenca-Bescós, G., Ramón del Río, D. and Canudo Sanagustín, J. I. 2010. La Cueva de los Huesos de Obón: Un cubil de hiena del Pleistoceno medio de Teruel (España). In Baquedano, E. and Rossell, J. (eds.), Actas de la 1a Reunión de científicos sobre cubiles de hyena (y otros grandes carnívoros) en los yacimientos arqueológicos de la Península Ibérica. Servicio de Publicaciones del Museo arqueológico Regional, Alcalá de Henares. *Zona Arqueológica,* 13*:* 270-280.

Currant, A. and Jacobi, R. 2001. A formal mammalian biostratigraphy for the Late Pleistocene of Britain. *Quaternary Science Reviews*, 20:1707-1716.

Czaplewski, N.J. and Cartelle, C. 1998. Pleistocene bats from cave deposits in Bahia, Brazil. *Journal of Mammalogy*, 79: 784-803.

Daura, J., Sanz, M., Julià, R., García-Fernández, D., Fornós, J.J., Vaquero, M., Allué, E., López-García, J.M., Blain, H.A., Ortiz, J.E., Torres, T., Albert, R. M., Rodríguez-Cintas, À, Sánchez-Marco, A., Cerdeño, E., Skinner, A. R., Asmeron, Y., Polyak, V. J., Garcés, M., Arnold, L. J., Demuro, M., Pike, A. W. G., Euba, I., Rodríguez, R. F., Yagüe, A. S., . Villaescusa, L., Gómez, S. G., Rubio, A., Pedro, M., Fullola, J. M. and Zilhão, J. 2015. Cova del Rinoceront (Castelldefels, Barcelona): a terrestrial record for the Last Interglacial period (MIS 5) in the Mediterranean coast of the Iberian Peninsula. *Quaternary Science Reviews*, 114: 203-227.

Davis S. 2002. The mammals and birds from the Gruta do Caldeirão, Portugal. *Revista Portuguesa de Arqueologia*, 5: 29–98.

Davis, S.J., Robert, I. and Zilhão, J. 2007. Caldeirão cave (Central Portugal)-whose home? Hyaena, man, bearded vulture. *Courier-Forschungsinstitut Senckenberg*, 259: 213-226.

Daujeard, C., Geraads, D., Gallotti, R., Mohib, A. and Raynal, J.P. 2012. Carcass acquisition and consumption by carnivores and hominins in Middle Pleistocene sites of Casablanca (Morocco). *Journal of Taphonomy*, 10: 349-372.

Daura, J., Sanz, M., García, N., Allué, E., Vaquero, M., Fierro, E., Carrión, J.S., López-García, J.M., Blain, H.A., Sánchez-Marco, A. and Valls, C. 2013. Terrasses de la Riera dels Canyars (Gavà, Barcelona): the landscape of Heinrich Stadial 4 north of the “Ebro frontier” and implications for modern human dispersal into Iberia. *Quaternary Science Reviews*, 60: 26-48.

Dawkins, W. B. 1862. On a hyaena-den at Wookey-Hole, near Wells. *Quarterly Journal of the Geological Society of London*, 18: 115–126.

Dawkins, W. B. 1863. On a hyaena-den at Wookey Hole, near Wells. No. II. *Quarterly Journal of the Geological Society of London*, 19: 260–274.

Dawkins, W.B. 1867. On the Age of the Lower Brick-earths of the Thames Valley. *Quarterly Journal of the Geological Society*, 23: 91-109.

Dennell, R.W., Coard, R., Beech, M., Anwar, M. and Turner, A. 2005. Locality 642, an Upper Siwalik (Pinjor Stage) fossil accumulation in the Pabbi Hills, Pakistan. *Journal of the Palaeontological Society of India*, 50: 83-92.

Derevianko, A.P., Postnov, A.V., Rybin, E.P., Kuzmin, Y.V. and Keates, S.G. 2005. The Pleistocene peopling of Siberia: a review of environmental and behavioural aspects. *Bulletin of the Indo-Pacific Prehistory Association*, 25: 57-68.

de Ruiter, D.J., Brophy, J.K., Lewis, P.J., Churchill, S.E. and Berger, L.R. 2008. Faunal assemblage composition and paleoenvironment of Plovers Lake, a Middle Stone Age locality in Gauteng Province, South Africa. *Journal of Human Evolution*, 55:1102-1117.

Diedrich, C. 2006a. Ice age spotted hyenas? Hunting or only scavenging the cave bear *Ursus spelaeus* Rosenmuller at the Ice Age Spotted Hyena open air den and prey deposit site Bad Wildungen-Biedensteg (Hessia, Germany). *Επιστημονική Επετηρίδα του Τμήματος Γεωλογίας (ΑΠΘ)*, 98:193-200.

Diedrich, C.G. 2006b. The *Crocuta crocuta spelaea* (Goldfuss 1823) population from the early Late Pleistocene hyena open air prey deposit site Biedensteg (Bad Wildungen, Hess, NW Germany), a contribution to their phylogenetic position, coprolites and prey. *Cranium*, 23: 39-53.

Diedrich, C.G. 2008. Late Pleistocene hyenas *Crocuta crocuta spelaea* of Upper Rhine valley open air sites and a contribution to skull shape variability. *Cranium*, 25: 31-42.

Diedrich, C.G. 2009. A Late Pleistocene wolverine Gulo gulo (Linné, 1758) skeleton from the Sloup Cave in the Moravian Karst, Czech Republic. *Annalen des Naturhistorischen Museums in Wien. Serie A für Mineralogie und Petrographie, Geologie und Paläontologie, Anthropologie und Prähistorie*, 110A:123-132.

Diedrich, C.G. 2011a. A clan of Late Pleistocene hyenas, *Crocuta crocuta spelaea* (Goldfuss 1823), from the Rösenbeck Cave (Germany) and a contribution to cranial shape variability. *Biological journal of the Linnean Society*, 103: 191-220.

Diedrich, C.G. 2011b. Late Pleistocene Panthera leo spelaea (Goldfuss, 1810) skeletons from the Czech Republic (central Europe); their pathological cranial features and injuries resulting from intraspecific fights, conflicts with hyenas, and attacks on cave bears. *Bulletin of Geosciences*, 86: 817-840.

Diedrich, C.G. 2012a. An Ice Age spotted hyena *Crocuta crocuta spelaea* (Goldfuss 1823) population, their excrements and prey from the late Pleistocene hyena den of the Sloup Cave in the Moravian Karst, Czech Republic. *Historical Biology*, 24: 161-185.

Diedrich, C.G. 2012b. Europe's first Upper Pleistocene *Crocuta crocuta spelaea* (Goldfuss 1823) skeleton from the Koněprusy Caves: a hyena cave prey depot site in the Bohemian Karst (Czech Republic). *Historical Biology*, 24: 63-89.

Diedrich, C.G. 2012c. Late Pleistocene *Crocuta crocuta spelaea* (Goldfuss, 1823) clans as prezewalski horse hunters and woolly rhinoceros scavengers at the open air commuting den and contemporary Neanderthal camp site Westeregeln (central Germany). *Journal of Archaeological Science*, 39: 1749-1767.

Diedrich, C. 2012d. Typology of Ice Age spotted hyena *Crocuta crocuta spelaea* (Goldfuss, 1823) coprolite aggregate pellets from the European Late Pleistocene and their significance at dens and scavenging sites. *In* Hunt, A. P., Milàn, J., Lucas, S. G. and Spielmann, J. A. (eds.), Vertebrate coprolites. *New Mexico Museum of Natural History and Science, Bulletin*, 57*:* 369-377.

Diedrich, C. 2013a. Ice age geomorphological Ahorn Valley and Ailsbach River terrace evolution—and its importance for the cave use possibilities by cave bears, top predators (hyenas, wolves and lions) and humans (Neanderthals, Late Magdalénians) in the Frankonian Karst—case studies in the Sophie’s Cave near Kirchahorn, Bavaria. *E&G Quaternary Science Journal,* 62: 162-174.

Diedrich, C. 2013b. Recycling of badger/fox burrows in Late Pleistocene loess by hyenas at the den site Bad Wildungen-Biedensteg (NW, Germany): woolly rhinoceros killers and scavengers in a mammoth steppe environment of Europe. *Journal of Geological Research*, volume 2013, Article ID 190795, 31pages http://dx.doi.org/10.1155/2013/190795

Diedrich, C.G. 2014a. Late Pleistocene Eemian hyena and steppe lion feeding strategies on their largest prey—Palaeoloxodon antiquus Falconer and Cautley 1845 at the straight-tusked elephant graveyard and Neanderthal site Neumark-Nord Lake 1, Central Germany. *Archaeological and Anthropological Sciences*, 6: 271-291.

Diedrich, C.G. 2014b. Palaeopopulations of Late Pleistocene top predators in Europe: Ice Age spotted hyenas and steppe lions in battle and competition about prey. *Paleontology Journal*, *2014*. Volume 2014, Article ID 106203, 34 pages <http://dx.doi.org/10.1155/2014/106203>

Diedrich, C. 2015. Late Pleistocene spotted hyena den sites and specialized rhinoceros scavengers in the karstified Zechstein areas of the Thuringian Mountains (Central Germany). *E&G Quaternary Science Journal*, 64: 29-45.

Diedrich, C.G. and McFarlane, D.A. 2017. Homotherium from Middle Pleistocene archaeological and carnivore den sites of Germany–Taxonomy, taphonomy and a revision of the Schöningen, West Runton and other saber-tooth cat sites. *Quaternary International*, 436: 76-83.

Diedrich, C.G. and Žák, K. 2006. Prey deposits and den sites of the Upper Pleistocene hyena *Crocuta crocuta spelaea* (Goldfuss, 1823) in horizontal and vertical caves of the Bohemian Karst (Czech Republic). *Bulletin of Geosciences*, *Czech Geological Survey* 81: 237-276.

Discamps, E., Boudadi-Maligne, M., Chagneau, J., Armand, D., Guadelli, J.L. and Lenoir, M. 2012. Ours, hommes, hyènes: qui a occupé la grotte de Bourdette (Sainte-Colombe-en-Bruilhois, Lot-et-Garonne, France)?. *PALEO*, 23: 117-136.

Djamali, M., Biglari, F., Abdi, K., Andrieu-Ponel, V., de Beaulieu, J.-L., Mashkour, M. and Ponel, P. 2011. Pollen analysis of coprolites from a late Pleistocene–Holocene cave deposit (Wezmeh Cave, west Iran): insights into the late Pleistocene and late Holocene vegetation and flora of the central Zagros Mountains. *Journal of Archaeological Science,* 38: 3394-3401.

Donovan, D.T. 1988. The Late Pleistocene Sequence at Wells'. *Proceedings of the University of Bristol Spelaeological Society*, 18: 241-57.

Doyon, L., Li, Z., Li, H. and d’Errico, F. 2018. Discovery of circa 115,000-year-old bone retouchers at Lingjing, Henan, China. *PLoS ONE* 13(3): e0194318. <https://doi.org/10.1371/journal.pone.0194318>

Dusseldorp, G.L. 2009. A view to a kill: Investigating Middle Palaeolithic subsistence using an optimal foraging perspective. Leiden, Sidestone Press, 199 p.

Dusseldorp, G.L. 2011. Studying Pleistocene Neanderthal and cave hyena dietary habits: combining isotopic and archaeozoological analyses. *Journal of Archaeological Method and Theory*, 18: 224-255.

Duval, M., Falguères, C., Bahain, J.J., Grün, R., Shao, Q., Aubert, M., Dolo, J.M., Agustí, J., Martínez-Navarro, B., Palmqvist, P. and Toro-Moyano, I. 2012. On the limits of using combined U-series/ESR method to date fossil teeth from two Early Pleistocene archaeological sites of the Orce area (Guadix-Baza basin, Spain). *Quaternary Research*, 77: 482-491.

Duval, M., Grün, R., Parés, J.M., Martín-Francés, L., Campaña, I., Rosell, J., Shao, Q., Arsuaga, J.L., Carbonell, E. and de Castro, J.M.B. 2018. The first direct ESR analysis of a hominin tooth from Atapuerca Gran Dolina TD-6 (Spain) supports the antiquity of Homo antecessor. *Quaternary Geochronology,* 47:120–37.

Eames, A.J. 1930. Report on ground-sloth coprolite from Dona Ana County, New Mexico. *American Journal of Science*, 19,: 353-356.

Enloe, J.G. 2012a. Middle Palaeolithic cave taphonomy: Discerning humans from hyenas at Arcy‐sur‐Cure, France. *International Journal of Osteoarchaeology*, 22: 591-602.

Enloe, J.G. 2012b. Neanderthals, bears and hyenas, oh my! Competition for exclusive use of space. *Journal of Taphonomy*, 10: 193-204.

Ermolli, E.R., Sardella, R., Di Maio, G., Petronio, C. and Santangelo, N. 2010. Pollen and mammals from the late Early Pleistocene site of Saticula (Sant'Agata de' Goti, Benevento, Italy). *Quaternary International*, 225: 128-137.

Esin, U. and Benedict, P. 1963. Recent developments in the prehistory of Anatolia. *Current Anthropology*, 4: 339-346.

Espigares, M.P., Martínez-Navarro, B., Palmqvist, P., Ros-Montoya, S., Toro, I., Agustí, J. and Sala, R. 2013. *Homo* vs. *Pachycrocuta*: earliest evidence of competition for an elephant carcass between scavengers at Fuente Nueva-3 (Orce, Spain). *Quaternary International*, 295: 113-125.

# Evans, J. 1860. Flint Implements in the Drift: Being an account of further discoveries on the Continent and in England. London, J. B. Nichols, 82 p.

Falconer, H. 1860. On the ossiferous caves of the Peninsula of Gower, in Glamorganshire, South Wales: With an appendix, on a raised beach in Mewslade Bay, and the occurrence of the boulder-clay on Cefn-y-bryn by J. Prestwich, Esq., FRS, Treas. GS. *Quarterly Journal of the Geological Society of London*, 16: 487-491.

Fernández-Rodríguez, C.F., Rego, P.R. and Cortizas, A.M. 1995. Characterization and depositional evolution of hyaena (*Crocuta crocuta*) coprolites from La Valiña cave (northwest Spain). *Journal of Archaeological Science*, 22: 597-607.

Ferreira, L.F., Araujo, A. and Duarte, A.N. 1993. Nematode larvae in fossilized animal coprolites from Lower and Middle Pleistocene sites, Central Italy. *The Journal of Parasitology*, 79: 440-442.

Ferring, R., Oms, O., Agustí, J., Berna, F., Nioradze, M., Shelia, T., Tappen, M., Vekua, A., Zhvania, D. and Lordkipanidze, D. 2011. Earliest human occupations at Dmanisi (Georgian Caucasus) dated to 1.85–1.78 Ma. *Proceedings of the National Academy of Sciences*, 108:10432-10436.

Fourvel, J.B., Fosse, P., Brugal, J.P., Tournepiche, J.F. and Cregut-Bonnoure, E. 2012. Consumption of ungulate long bones by Pleistocene Hyaenas: A comparative study. *Journal of Taphonomy,* 10: 239-263.

Fourvel, J. B., Fosse, P., Fernandez, P., and Antoine, P. O. 2015. Large mammals of Fouvent-Saint-Andoche (Haute-Saône, France): a glimpse into a Late Pleistocene hyena den. *Geodiversitas*, 37: 237-266.

Fourvel, J.B., Michel, P., Argant, J. and Lateur, N., 2017. Le réseau Salomé (Vallon Pont-d’Arc, Ardèche, France): un nouvel exemple de compétition et d’interactions interspécifiques (ours-hyène). *Paléo,Revue d’Archéologie Préhistorique, Société de samis du Musée national de préhistoire et de la recherche archéologique* - SAMRA, 2017. <hal-01780922>

Fourvel, J. B., Thackeray, J. F., Brink, J. S., O’Regan, H., and Braga, J. 2018. Taphonomic interpretations of a new Plio-Pleistocene hominin-bearing assemblage at Kromdraai (Gauteng, South Africa). *Quaternary Science Reviews*, 190: 81-97.

Fosse, P. 1996. La grotte n° 1 de Lunel-Viel (Hérault, France): Repaire d'hyènes du Pléistocène moyen. Etude taphonomique du matériel osseux. *Paléo Revue d'Archéologie Préhistorique*, 8: 47-79.

Fosse, P. 1997. Variabilité des assemblages osseux créés par l’hyène des cavernes. *Paléo*, 9:15–54.

Garcia, J., Martínez, K., Carbonell, E., Agustí, J., and Burjachs, F. 2012. Defending the early human occupation of Vallparadís (Barcelona, Iberian Peninsula): a reply to Madurell-Malapeira et al.(2012). *Journal of Human Evolution*, 63: 568-575.

Gatta, M. and Rolfo, M.F. 2017. Cava Muracci: A New Middle-Upper Palaeolithic Site In West-Central Italy. *Mediterranean Archaeology and Archaeometry*, 17: 105-117.

Gatta, M., Sinopoli, G., Giardini, M., Giaccio, B., Hajdas, I., Pandolfi, L., Bailey, G., Spikins, P., Rolfo, M.F. and Sadori, L. 2016. Pollen from Late Pleistocene hyena (*Crocuta crocuta spelaea*) coprolites: An interdisciplinary approach from two Italian sites. *Review of Palaeobotany and Palynology*, 233: 56-66.

Gaudzinski, S. 2004. Subsistence patterns of Early Pleistocene hominids in the Levant—taphonomic evidence from the'Ubeidiya Formation (Israel). *Journal of Archaeological Science*, 31: 65-75.

Gerasimenko, N., Ridush, B. and Avdeyenko, Y. 2018. Late Pleistocene and Holocene environmental changes recorded in deposits of the Bukovynka Cave (the East-Carpathian foreland, Ukraine). *Quaternary International*. <https://doi.org/10.1016/j.quaint.2018.03.028>

Germonpré, M. and Sablin, M.V. 2001. The cave bear (*Ursus spelaeus*) from Goyet, Belgium. The bear den in Chamber B (bone horizon 4). *Bulletin de l’Institut Royal des Sciences de Belgiques, Science de la Terre*, 71: 209-233.

Gerometta, K. 2017. Late Pleistocene to Holocene cave geoarchaeology on the eastern Adriatic coast and in its hinterland. PhD Thesis. University of Zagreb, Sveučilište U Zagrebu, 296 p.

Ghezzo, E., Palchetti, A. and Rook, L. 2014. Recovering data from historical collections: stratigraphic and spatial reconstruction of the outstanding carnivoran record from the Late Pleistocene Equi cave (Apuane Alps, Italy). *Quaternary Science Reviews*, 96: 168-179.

Ghinassi, M., Oms, O., Papini, M., Scarciglia, F., Carnevale, G., Sani, F., Rook, L., Delfino, M., Pavia, M., Libsekal, Y. and Bondioli, L. 2015. An integrated study of the Homo-bearing Aalat stratigraphic section (Eritrea): An expanded continental record at the Early–Middle Pleistocene transition. *Journal of African Earth Sciences*, 112: 163-185.

Gibert, J., Martínez, B., Caporicci, C., Jiménez, C., Ferrández, C., Ribot, F., Soria, F., Pérez-Cuadrado, J.L., Arribas, A., Canals, J., García-Targa, J.M., Iglesias, A. and Romero, R. 1988. Resumen de las investigaciones paleoantropológicas y arqueológicas de Orce (Granada) y Cueva Victoria (Cartagena). *Coloquios de Paleontología,* 42:11-60.

Gibert, J., Leakey, M., Ribot, F., Gibert, L., Arribas, A. and Martínez-Navarro, B. 1995. Presence of the Cercopithecid genus *Theropithecus* in Cueva Victoria (Murcia, Spain). *Journal of Human Evolution*, 28:31-46.

Gibert, L., Scott, G.R., Scholz, D., Budsky, A., Ferrandez, C., Ribot, F., Martin, R.A. and Lería, M. 2016. Chronology for the Cueva Victoria fossil site (SE Spain): evidence for early Pleistocene Afro-Iberian dispersals. *Journal of Human Evolution*, 90:183-197.

Gil-Romera, G., Neumann, F.H., Scott, L., Sevilla-Callejo, M. and Fernández-Jalvo, Y. 2014. Pollen taphonomy from hyaena scats and coprolites: preservation and quantitative differences. *Journal of Archaeological Science*, 46: 89-95.

Goldberg, P. 2001. Some micromorphological aspects of prehistoric cave deposits. *Cahiers d’Archéologie du CELAT*, 10: 161-75.

Goldberg, P. and Aldeias, V. 2018. Why does (archaeological) micromorphology have such little traction in (geo) archaeology?. *Archaeological and Anthropological Sciences*, 10: 269-278.

Goldberg, P., Laville, H. and Meignen, L. 2007. Stratigraphy and geoarchaeological history of Kebara Cave, Mount Carmel. *In* Bar-Yosef, O. and Meignen, L. (eds.), Kebara Cave, vol 2. Peabody Museum, Cambridge, 49-89.

Goldberg, P., Weiner, S., Bar-Yosef, O., Xu, Q. and Liu, J. 2001. Site formation processes at Zhoukoudian, China. *Journal of Human Evolution*, 41: 483-530.

González-Sampériz, P.; Montes, L. and Utrilla, P. 2003. Pollen in hyena coprolites from Gabasa cave (Northern Spain). *Review of Palaebotany and Payinology,* 126: 7-15.

González-Sampériz, P., Valero-Garcés, B.L., Carrión, J.S., Peña-Monné, J.L., García-Ruiz, J.M. and Martí-Bono, C. 2005. Glacial and Lateglacial vegetation in northeastern Spain: new data and a review. *Quaternary International*, 140: 4-20.

Grine, F. E. and Klein, R. G. 1993. Late Pleistocene human remains from the Sea Harvest site, Saldanha Bay, South Africa. *South African Journal of Science,* 89:145–152.

Guadelli, J. L. 1989. Étude taphonomique du repaire d’hyènes de Camiac (Gironde, France), Éléments de comparaison entre un site naturel et un gisement préhistorique. *Bulletin de l’Association Française pour l’Étude du Quaternaire*, 2: 91–100.

Guadelli, J.-L., Lenoir, M., Marambat, L., and Paquero, M.-M. 1988. Un gisement de l’interstade Würmien en Gironde: Le gisement de Camiac à Camiac et Saint-Denis. *In* Binford, L. and Rigaud, J.-P. (eds.), L’Homme de Neandertal, actes de la colloque International de Liège (4–7 Décembre 1986), Volume 4: La Technique. Liège: Université de Liège, 59-60.

Hansen, R. M. 1980. Late Pleistocene plant fragments in the dungs of herbivores at Cowboy Cave. *In* Jennings, J. D. (ed.), Cowboy Cave. *University of Utah, Anthropological Papers*, 104: 179-189.

Herries, A.I., Reed, K.E., Kuykendall, K.L. and Latham, A.G. 2006. Speleology and magnetobiostratigraphic chronology of the Buffalo Cave fossil site, Makapansgat, South Africa. *Quaternary Research*, 66: 233-245.

Halkett, D., Hart, T., Yates, R., Volman, T.P., Parkington, J.E., Orton, J., Klein, R.G., Cruz-Uribe, K. and Avery, G. 2003. First excavation of intact Middle Stone Age layers at Ysterfontein, Western Cape Province, South Africa: implications for Middle Stone Age ecology. *Journal of Archaeological Science*, 30: 955-971.

Hansen, R.M. 1978. Shasta Ground Sloth food habits, Rampart Cave, Arizona. *Paleobiology*, 4: 302-319.

Hauthal, R., Roth, S. and Lehmann-Nitsche, R., Eds. 1899. El mamífero misterioso de la Patagonia: *Grypotherium domesticum. Revista del Museo de La Plata*, 9: 411-472.

Hedges, R.E.M., Housley, R.A., Bronk, C.R. and Klinken, G.V. 1991. Radiocarbon dates from the Oxford AMS system: Archaeometry datelist 12. *Archaeometry*, 33: 121-134.

Hedges, R.E.M., Pettitt, P.B., Ramsey, C.B. and Klinken, G.V. 1998. Radiocarbon dates from the Oxford AMS system: Archaeometry datelist 25. *Archaeometry*, 40: 227-239.

Heslop, R. 2006. Within this hill. *Open University Geological Society Journal Spring Edition 2006,* 27-30.

Hofreiter, M., Poinar, H.N., Spaulding, W.G., Bauer, K., Martin, P.S., Possnert, G. and Pääbo, S. 2000, A molecular analysis of ground sloth diet through the last glaciation. *Molecular Ecology*, 9: 1975-1984.

Hofreiter, M., Betancourt, J.L., Pelliza de Sbriller, A., Markgraf, V., and McDonald, H.G. 2003. Phylogeny, diet and habitat of an extinct ground sloth from Cuchillo Curá, Neuquén Province, southwest Argentina. *Quaternary Research*, 59: 364–378.

Hooijer, D. A. 1961. Middle Pleistocene mammals from Latamme, Orntes Valley, Syria. *Annales Archeologie Syrie*, 11: 117-132.

Horwitz, L.K. and Goldberg, P.,1989. A study of Pleistocene and Holocene hyaena coprolites. *Journal of Archaeological Science*, 16: 71-94.

Hunt, A. P. and Lucas, S. G. 2018. The record of sloth coprolites in North and South America: Implications for terminal Pleistocene extinctions. *New Mexico Museum of Natural History and Science, Bulletin,* 79: 277-298.

Hunt, A. P., Lucas, S. G. and Spielmann, J. A. 2012a. New coprolite ichnotaxa from the Buckland Collection at the Oxford University Museum of Natural History. *In* Hunt, A. P., Milàn, J., Lucas, S. G. and Spielmann, J. A. (eds.), Vertebrate coprolites. *New Mexico Museum of Natural History and Science, Bulletin* 57: 115-124.

Hunt, A. P., Santucci, V. L., Tweet, J. S. and Lucas, S. G. 2012b. Vertebrate coprolites and other bromalites in National Park Service areas; *In* Hunt, A. P., Milàn, J., Lucas, S. G. and Spielmann, J. A. (eds.), Vertebrate coprolites. *New Mexico Museum of Natural History and Science, Bulletin*, 57: 343-353.

Iñigo, C., Molero, G. and Maldonado, E. 1998. Los carnívoros del yacimiento pleistoceno de Cueva del Búho (Segovia, España) y sus huellas de actividad. *Estudios Geológicos*, 54: 65-73.

Ivanova, S., Gurova, M., Spassov, N., Hristova, L., Tzankov, N., Popov, V., Marinova, E., Makedonska, J., Smith, V., Ottoni, C. and Lewis, M. 2016. Magura Cave, Bulgaria: a multidisciplinary study of Late Pleistocene human palaeoenvironment in the Balkans. *Quaternary International*, 415: 86-108.

Jacobi, R. M., and Hawkes, C. J. 1993. Archaeological notes: Work at the Hyaena Den, Wookey Hole. *Proceedings of the University of Bristol Spelaeological Society*, 19: 369–371.

Jacobi, R.M., Higham, T.F. and Ramsey, C.B. 2006. AMS radiocarbon dating of Middle and Upper Palaeolithic bone in the British Isles: improved reliability using ultrafiltration. *Journal of Quaternary Science: Published for the Quaternary Research Association*, 21: 557-573.

Jeannet, M. and Mein, P. 2016. The middle Pleistocene Muridae (Mammalia, Rodentia) from l’Igue des Rameaux (Tarn-et-Garonne, France). *PALEO [Online]*, 27 | 2016, http://journals.openedition.org/paleo/3264.

Jones, E.L., 1882. On the exploration of two caves in the neighbourhood of Tenby: Communicated by Prof. W. Boyd Dawkins, FRS, FGS. *Quarterly Journal of the Geological Society of London*, 38: 282-288.

Jordá, J.F., Maestro, A., Aura, J.E., Álvarez-Fernández, E., Avezuela, B., Badal, E., Morales, J.V., Pérez, M. and Villalba, M.P. 2011. Evolución paleogeográfica, paleoclimática y paleoambiental de la costa meridional de la Península Ibérica durante el Pleistoceno superior. El caso de la Cueva de Nerja (Málaga, Andalucía, España). *Boletín Real Sociedad Española de Historia Natural, Sección Geológica*, 105:137–147.

Kahlke, R.D. and Gaudzinski, S. 2005. The blessing of a great flood: differentiation of mortality patterns in the large mammal record of the Lower Pleistocene fluvial site of Untermassfeld (Germany) and its relevance for the interpretation of faunal assemblages from archaeological sites. *Journal of Archaeological Science*, 32: 1202-1222.

Kao, F. T. 1962, Notes on coprolites from Nihowan series. *Vertebrata Palasiatica*, 6: 396-403.

Keller, T. and Försterling, G. 2002. Unterbrochene Mahlzeit? Eiszeitliche Knochenfunde aus dem Gipskarst von Morschen-Konnefeld. *Archäologische und Paläontologische Bodendenkmalpflege des Landesamtes für Denkmalpflege Hessen*, 202: 18-21.

Kitagawa, K. 2014. Exploring hominins and animals in the Swabian Jura: study of the Paleolithic fauna from Hohlenstein-Stadel. PhD Thesis. University of Tübingen, Tübingen. 302 p.

Klein, R.G., 1987. Reconstructing how early people exploited animals: problems and prospects. In Nitecki, M. H. and Nitecki, D. V. (eds.), The evolution of human hunting. New York, Plenum Press, 11-45.

Klein, R.G., Cruz-Uribe, K. and Beaumont, P.B. 1991. Environmental, ecological, and paleoanthropological implications of the late Pleistocene mammalian fauna from Equus Cave, Northern Cape Province, South Africa. *Quaternary Research*, 36: 94-119.

Klein, R.G. 1984. Later Stone Age faunal samples from Heuningneskrans Shelter (Transvaal) and Leopard's Hill Cave (Zambia). *The South African Archaeological Bulletin*, 39: 109-116.

Klein, R.G. and Cruz-Uribe, K. 1991. The bovids from Elandsfontein, South Africa, and their implications for the age, palaeoenvironment, and origins of the site. *African Archaeological Review*, 9: 21-79.

Klein, R.G., Avery, G., Cruz-Uribe, K. and Steele, T.E. 2007. The mammalian fauna associated with an archaic hominin skullcap and later Acheulean artifacts at Elandsfontein, Western Cape Province, South Africa. *Journal of Human Evolution*, 52: 164-186.

Klein, R.G., Cruz-Uribe, K., Halkett, D., Hart, T. and Parkington, J.E. 1999. Paleoenvironmental and human behavioral implications of the Boegoeberg 1 late Pleistocene hyena den, Northern Cape Province, South Africa. *Quaternary Research*, 52: 393-403.

Kuhn, B.F., Herries, A.I., Price, G.J., Baker, S.E., Hopley, P., Menter, C. and Caruana, M.V. 2016. Renewed investigations at Taung; 90 years after the discovery of *Australopithecus africanus*. *Palaeontologia Africana,* 51: 10–26.

Lagiglia, H. A. 1968. Nuevos aportes a los fechados de radiocarbono de la Argentina. *Journal de la Société des américanistes*, 57: 161-168.

Laming-Emperaire, A., Prous, A., Vilhena de Moraes, A. and Beltrão, M. C. 1975. Grottes et Abris de la Region de Lagoa Santa, Minas Gerais, Bresil— Premier Rapport de la Mission Archéologique Franco-Brésilienne de Lagoa Santa. Cahiers D’Archeólogie d’Amerique du Sud, 1. École Pratique des Hautes Etudes VIe Section: Sciences Economiques et Sociales, Paris, 185 p.

Landeck, G. and Garriga, J.G. 2016. The oldest hominin butchery in European mid-latitudes at the Jaramillo site of Untermassfeld (Thuringia, Germany). *Journal of Human Evolution*, 94: 53-71.

Larkin, N.R., Alexander, J. and Lewis, M.D. 2000. Using experimental studies of recent faecal material to examine hyaena coprolites from the West Runton Freshwater Bed, Norfolk, UK. *Journal of Archaeological Science*, 27:19-31.

Lartigot‑Campin, A.S. and Mone, H. 2017. Analyses polliniques et parasitologiques préliminaires de coprolithes de carnivores du site moustérien des Ramandils (Port-la-Nouvelle, Aude, France). *Quaternaire. Revue de l'Association française pour l'étude du Quaternaire*, 28: 217-224.

Laudermilk, J.D. and Munz, P.A. 1934. Plants in the dung of *Nothrotherium* from Gypsum Cave, Nevada. *Carnegie Institution of Washington Publication*, 453: 31–37.

Laudermilk, J. D. and Munz, P. A. 1938. Plants in the dung of *Nothrotherium* from Rampart and Muav caves, Arizona. *Carnegie Institute of Washington Publication*, 487: 271-281.

Leakey, M. D. 1971. Olduvai Gorge, vol. 3 (Excavations in Beds I and II, 1960-1963). Cambridge, Cambridge University Press, 328 p.

Lewis, M. 2010. Palynology of hyaena (*Crocuta crocuta*) coprolites from British Pleistocene sites. *Cave and Karst Science: Transactions of the British Cave Research Association*, 37: 26.

Lewis, M. 2011a. Palynology of hyaena (*Crocuta crocuta*) coprolites from the bone bed at Victoria Cave, North Yorkshire. *In* Stringer, C., Ashton, N. and Bello, S. (eds.), Proceedings of the 1st Workshop AHOB3: Ancient Human Occupation of Britain, Dispersal of Early Humans: Adaptions, frontiers and new territories: London, AHOB, p. 17.

Lewis, M.D. 2011b. Pleistocene hyaena coprolite palynology in Britain: implications for the environments of early humans. *In* Ashton, N., Lewis, S. G. and Stringer, C. (eds.), The Ancient Human Occupation of Britain.Developments in Quaternary Sciences Volume 14. Amsterdam, Elsevier, 263-278.

Liebe, K.T, 1876. Die Lindentaler Hyänenhöhle und andere diluviale Knochenfunde in Ostthüringen. *Archäologisches und Anthropologisches Organ der deutschen Gesellschaft für Anthropologie, Ethnographie und Urgeschichte*, 9:1-55.

Lister, A.M. 2001. Age profile of mammoths in a late Pleistocene hyaena den at Kent’s Cavern, Devon, England. *In* West, D. (ed.), Proceedings of the International Conference on Mammoth Site Studies. *Publications in Anthropology, University of Kansas,* 22:35-43.

Lister, A.M., McGlade, J.M. and Stuart, A.J. 1990. The early Middle Pleistocene vertebrate fauna from Little Oakley, Essex. *Phiosophical Transactions of the Royal Society, Series B,* 328: 359-385.

Logan, L.E. 1977, The paleoclimate implications of the avian and mammalian faunas of Lower Sloth Cave, Guadalupe Mountains, Texas. MS Thesis. Lubbock, Texas Tech University, 72 p.

Logan, L. E. and Black, C. C. 1979. The Quaternary vertebrate fauna of Upper Sloth Cave, Guadalupe Mountains National Park, Texas. *In* Genoways, H. H. and Baker, R. J. (eds.), Biological investigations in the Guadalupe Mountains National Park. *National Park Service Proceedings and Transactions Series*, 4: 141-158.

Long, A. and Martin, P.S. 1974. Death of American ground sloths. *Science*, 186: 638-640.

Long, A., Hansen, R. M. and Martin, P.S. 1974. Extinction of the Shasta Ground Sloth. *Geological Society of America Bulletin*, 85: 1843-1848.

Lubin, V.P., Zubov, A.A., Romanova, G.P. and Kharitonov, V.M. 2002. Barakay Mousterian cave site in the Northern Caucasus (Stratigraphy, stone industry and skeletal remains of paleoanthrope). *Human evolution*, 17: 215-229.

Lull, R. S. 1929. A remarkable ground sloth. *Memoir of the Peabody Museum, Yale University*, 3: 1-39.

Macphail, R.I. and Goldberg, P. 1999. The soil micromorphological investigation of Westbury Cave. *In* Andrews, P., Stringer, C. B. and Currant, A. (eds.), Westbury Cave: the Natural History Museum Excavations 1976-1984. Western Academic and Specialist Press, Bristol, 59-86.

Madurell-Malapeira, J., Alba, D. M., Espigares, M. P., Vinuesa, V., Palmqvist, P., Martínez-Navarro, B., & Moya-Sola, S. 2017. Were large carnivorans and great climatic shifts limiting factors for hominin dispersals? Evidence of the activity of *Pachycrocuta brevirostris* during the Mid-Pleistocene Revolution in the Vallparadís Section (Vallès-Penedès Basin, Iberian Peninsula). *Quaternary International*, 431: 42-52.

Magniez, P. 2009. Taphonomic study of the Middle and Upper Palaeolithic large mammal assemblage of Tournal Cave (Bize-Minervois, France). *Journal of Taphonomy*, 7:203–233.

Majkić, A., d’Errico, F., Milošević, S., Mihailović, D. and Dimitrijević, V. 2018. Sequential Incisions on a Cave Bear Bone from the Middle Paleolithic of Pešturina Cave, Serbia. *Journal of Archaeological Method and Theory*, 25: 69–116.

Mangano, G. 2011. An exclusively hyena-collected bone assemblage in the Late Pleistocene of Sicily: Taphonomy and stratigraphic context of the large mammal remains from San Teodoro Cave (North-Eastern Sicily, Italy). *Journal of Archaeological Science*, 38: 3584-3595.

Mangano, G. and Bonfiglio, L. 2005. New stratigraphic and taphonomic data from the late Pleistocene deposits of the San Teodoro Cave (North-Eastern Sicily, Italy). *Sezione di Museologia Scientifica e Naturalistica*, 1: 89-98.

Mangano, G., Bonfiglio, L. and Petruso, D. 2005. Excavations of 2003 at the S. Teodoro Cave (North-Eastern Sicily, Italy): preliminary faunistic and stratigraphic data. *Geo Alp*, 2: 71-76.

Marchal, F., Monchot, H., Coussot, C., Desclaux, E., Deschamp, P., Thiébaut, C., Bahain, J.J., Falguères, C. and Dolo, J.M. 2009. Neandertals paleoenvironment in Western Provence: The contribution of Les Auzières 2 (Méthamis, Vaucluse, France). *Comptes Rendus Palevol*, 8: 493–502.

Marciszak, A. and Stefaniak, K. 2010, Two forms of cave lion: Middle Pleistocene *Panthera spelaea fossilis* REICHENAU, 1906 and Upper Pleistocene *Panthera spelaea spelaea* GOLDFUSS, 1810 from the Bisnik Cave, Poland. *Neues Jahrbuch für Geologie und Paläontologie-Abhandlungen* 258: 339-351.

Marciszak, A., Socha, P., Nadachowski, A. and Stefaniak, K. 2011. Carnivores from Biśnik Cave. *Quaternaire, Hors-série*, 4: 101-106.

Marder, O., Alex, B., Ayalon, A., Bar-Matthews, M., Bar-Oz, G., Bar-Yosef Mayer, D., Berna, F., Boaretto, E., Caracuta, V., Frumkin, A. and Goder-Goldberger, M. 2013. The Upper Paleolithic of Manot Cave, western Galilee, Israel: The 2011-12 excavations. *Antiquity*, Project Gallery 87(337): http://antiquity.ac.uk/projgall/marder337

Maroto, J., Soler, M. and Fullola, J. M. 1996. Cultural change between the Middle and Upper Paleolithic in Catalonia; in Carbonell, E. and Vacqero, M. (eds.), The last Neanderthals, the first anatomically modern humans:A tale about the human diversity. Cultural change and human evolution: The Crisis at 40 KA BP. Tarragona, Spain, Fundacio Catalana per la Recerche, 219-250.

Marra, A.C., Villa, P., Beauval, C., Bonfiglio, L. and Goldberg, P. 2004. Same predator, variable prey: taphonomy of two Upper Pleistocene hyena dens in Sicily and SW France. *Revue de paléobiologie*, 23: 787-801.

Martin, P.S., Sabela, B.E. and Shutler, D. 1961. Rampart Cave coprolites and ecology of the Shasta Ground Sloth. *American Journal of Science*, 259: 102-127.

Martínez, J.G., Aschero, C.A., Powell, J.E. and Rodríguez, M.F. 2004. First evidence of extinct megafauna in the Southern Argentinian Puna. *Current Research in the Pleistocene*, 21: 104-107.

Martínez-Navarro, B., Rook, L., Segid, A., Yosief, D., Ferretti, M.P., Shoshani, J., Tecle, T.M., Libsekal, Y. 2004. The large fossil mammals from Buia (Eritrea): systematics, biochronology and paleoenvironments. *Rivista Italiana di Paleontologia e Stratigrafia*, 110: 61-88.

Mashkour, M., Radu, V., Mohaseb, A., Hashemi, N., Otte, M. and Shidrang, S. 2009. The Upper Paleolithic faunal remains from Yafteh cave (Central Zagros), 2005 campaign. A preliminary study. *In* Le Paleolithique D’Iran. Archaeopress, Oxford, 73-85.

Maureille, B., Costamagno, S., Beauval, C., Mann, A. E., Garralda, M. D., Mussini, C., Laroulandie, V., Rendu, W., Royer, A., Seguin, G. and Vandermeersch, B. 2017. The challenges of identifying partially digested human teeth: first description of Neandertal remains from the Mousterian site of Marillac (Marillac-le-Franc, Charente, France) and implications for palaeoanthropological research. *PALEO. Revue d'archéologie préhistorique*, 28: 201-212.

Mazza, P.P. and Bertini, A. 2013. Were Pleistocene hippopotamuses exposed to climate‐driven body size changes?. *Boreas*, 42: 194-209.

Mead, J.I., Agenbroad, L. D., Martin, P. S. and Davis, O. K. 1984. The mammoth and sloth dung from Bechan Cave in Southern Utah. *Current Research in the Pleistocene*, 1: 79-80.

Mead, J.I., Agenbroad, L. D., Davis, O.K. and Martin, P.S. 1986. Dung of *Mammuthus* in the arid Southwest, North America. *Quaternary Research*, 25: 121-127.

Michel, P. 2005. Un repaire Würmien d’hyènes des cavernes: La Grotte d’Unikoté (Iholdy, Pyrénées-Atlantiques, France). *In* Lasheras, J. A. and Montes, R. (eds.), Actas de la Reunión Cientíﬁca Neandertales Cantábricos, estado de la cuestión. Museo de Altamira: Santander, 131-150.

Mitzopoulos, M.K. and Zapfe, H. 1963. Fossile hyaniden-koprolithen aus Pikermi. *Annales Geologic de pays Helleniques, Athens*, 14: 405-407.

Mol, D. and De Vos, J. 1995. De hyena uit de Oosterschelde. *Grondboor & Hamer*, 49: 139-149.

Monchot, H. and Aouraghe, H. 2009. Deciphering the taphonomic history of an Upper Paleolithic faunal assemblage from Zouhrah Cave/El Harhoura 1, Morocco. *Quaternaire. Revue de l'Association française pour l'étude du Quaternaire*, 20: 239-253.

Mosquera, M., Ollé, A., Rodríguez-Álvarez, X.P. and Carbonell, E. 2018. Shedding light on the Early Pleistocene of TD6 (Gran Dolina, Atapuerca, Spain): The technological sequence and occupational inferences. *PLOS ONE* 13(1): e0190889. <https://doi.org/10.1371/journal.pone.0190889>

Mouton, P. and Joffroy, R. 1948. Paléolithique Moyen et repaire d’hyènes au ‘‘Perthuis de Roche’’ de Morancourt. *Haute-Marne Bulletin de la Société préhistorique française*, 45: 256–259.

Müller-Beck, H. 2004. Die Ilsenhöhle unter Burg Ranis (Kreis Pösneck). *In* Meller, H. (ed.), Paläolithikum und Mesolithikum. *Kataloge zur Dauerausstellung im Landesmuseum für Vorgeschichte Halle*, 1: 201–216.

Musil, R. 1962. Die Höhle "Sveduv stul", ein typischer Höhlenhyänenhorst. *Anthropos Neue Serie*, 5: 97-260.

Neto de Carvalho, C. and Farinha, C., 2006. Coprolites from Portugal: a synthesis with the report of new findings. *Ichnology Newsletter*, 27: 10-15.

Nunes, V.H.B., 2015. Parasitos encontrados em hospedeiros extintos. PhD Thesis. Rio de Janeiro, Escola Nacional de Saudé Pública Sergio Arouca, 82 p.

O’Connor, T. and Lord, T. 2013. Cave palaeontology. *In* Waltham, T. and Lowe, D. (eds.), Caves and Karst of the Yorkshire Dales, 1. Buxton, British Cave Research Association, 225-238.

Ovodov, N.D., Crockford, S.J., Kuzmin, Y.V., Higham, T.F.G., Hodgins, G.W.L. and van der Plicht, J. 2011. A 33,000-Year-Old Incipient Dog from the Altai Mountains of Siberia: Evidence of the Earliest Domestication Disrupted by the Last Glacial Maximum. *PLoS ONE* 6(7): e22821. <https://doi.org/10.1371/journal.pone.0022821>

# Palacio, P., Berthonaud, V., Guérin, C., Lambourdière, J., Maksud, F., Philippe, M., Plaire, D., Stafford, T., Marsolier-Kergoat, M.C. and Elalouf, J.M. 2017. Genome data on the extinct Bison schoetensacki establish it as a sister species of the extant European bison (Bison bonasus). *BMC evolutionary biology*, 17:48 DOI 10.1186/s12862-017-0894-2

Pappa, S., Tsoukala, E., Lazaridis, G. and Rabeder, G. 2005. Milk teeth of Quaternary carnivores from northern Greek Caves. *Naturhistorische Gesellschaft Nürnberg*, 45: 169-182.

Parfitt, S. A., and Larkin, N. R. 2010. Exceptionally large hyaena coprolites from West Runton and the possible presence of the giant short-faced hyaena (*Pachycrocuta brevirostris*). *Quaternary International,* 228: 131-134.

Pautret-Homerville, C., Argant, A., Combier, J., Gély, B. and Argant, J. 2011. La grotte aux ours de Châteaubourg (Ardèche, France): synthèse sur un gisement découvert il ya un siècle et demi.*Quaternaire Hors-Série*, 4: p.185-199.

Pavia, M., 2007. The first occurrence of rock partridge Alectoris graeca (Meisner 1804) in Sicily and its palaeobiogeografical significance. *Avocetta*, 131: 61-66.

Pengelly, W. 1877. History of cavern exploration in Devonshire, England. *American Journal of Science and Arts,* 14: 299-308.

Pérez Ripoll, M. 1977. Los mamíferos del yacimiento musteriense de Cova Negra (Játiva, Valencia). *Servicio de Investigación Prehistórica, Serie de Trabajos Varios Valencia,* 53:7–147.

Perri, A.R., Heinrich, S., Gur-Arieh, S. and Saunders, J.J. 2017. Earliest evidence of *Toxocara* sp. in a 1.2-million-yr-old extinct hyena (*Pachycrocuta brevirostris*) coprolite from Northwest Pakistan. *Journal of Parasitology*, 103: 138-141.

Petronio, C., Di Stefano, G., Pandolfi, L. and Salari, L. 2014. The Late Pleistocene mammal fauna from Montemerano-Manciano (Grosseto, central Italy*). Bollettino del Museo Civico di Storia Naturale di Verona, Geologia Paleontologia Preistoria*, 38: 103-116.

Petrucci, M., Giardini, M. and Sadori, L. 2005. Analisi pollinica di coproliti di iena macchiata (*Crocuta crocuta*, Erxleben) dell’ultimo glaciale della Puglia. *Informatore Botanico Italiano,* 37: 932-933.

Pičuljan, L., Brajković, D., Radović, S., Sala, B. and Miracle, P. T. 2013. Morphometric and taphonomic analysis of the Upper Pleistocene faunal assemblage from Hijenka pécina. *In* Quaternary Geology, Croatia, Book of Abstracts: Zagreb, Hrvatska Akademija Znanosti I Umjetnosti And Geološki Zavod Slovenije, 43-44.

Pineda, A., Saladié, P., Expósito, I., Rodríguez-Hidalgo, A., Cáceres, I., Huguet, R., Rosas, A., López-Polín, L., Estalrrich, A., García-Tabernero, A. and Vallverdú, J. 2017. Characterizing hyena coprolites from two latrines of the Iberian Peninsula during the Early Pleistocene: Gran Dolina (Sierra de Atapuerca, Burgos) and la Mina (Barranc de la Boella, Tarragona). *Palaeogeography, Palaeoclimatology, Palaeoecology* 480: 1-17.

Poinar, H.N., Hofreiter, M., Spaulding, W.G., Martin, P.S., Stankiewicz, B.A., Bland, H., Evershed, R.P., Possnert, G. and Pääbo, S. 1998. Molecular coproscopy: dung and diet of the extinct ground sloth *Nothrotheriops shastensis. Science*, 281: 402-406.

Rabinovich, R., Bar-Yosef, O., Vandermeersch, B. and Horwitz, L.K. 2004. Hominid-carnivore interactions in the Palaeolithic site of Qafzeh Cave, Israel. *Revue de Paleobiologie, Geneve*, 23: 627-637.

Richter, D., Grün, R., Joannes-Boyau, R., Steele, T.E., Amani, F., Rué, M., Fernandes, P., Raynal, J.P., Geraads, D., Ben-Ncer, A. and Hublin, J.J. 2017. The age of the hominin fossils from Jebel Irhoud, Morocco, and the origins of the Middle Stone Age. *Nature*, 546: 293-296.

Ridush, B. 1999. Traces of Paleolithic culture in the Bukovynka Cave (the preliminary report): *Questions of ancient and middle age history, archaeology and ethnology*, 3: 118-132.

Ridush, B. 2004. Chetvertynni vidklady pechery Bukovynka ta yih paleogeografichne znachennya [Quaternary deposits of the Bukovynka Cave and their palaeogeographical significance]. Naukovy visnyk Chernivetskogo Universutetu, 199: Geografia, Chernivtsi, 105-115

Ridush, B. 2009. “Bear caves” in Ukraine. *Acta Carsologica Slovaca*, 47: 64-84.

Rios-Garaizar, J., Garate, D., Gómez-Olivencia, A., Iriarte-Avilés, E., Aranburu-Artano, A., Arceredillo-Alonso, D., Garcia, A., Iriarte-Chiapusso, M.J., Moreno, J., Murelaga, X. and Ortíz, J.E., Torres, T., San Pedro-Calleja, Z. and Zapata-Peña, L. 2011. The Lower to Middle Palaeolithic transition in northern Iberia: new data from Arlanpe Cave. *Antiquity*, 85: 1-5.

Riquelme, J.A., Rodríguez-Vidal, J., Carmona, R. and Martínez-Aguirre, A. 2004. La Cueva del Grajo II (Priego de Córdoba), informe del a Intervención Arqueológica de Urgencia y primeras actuaciones realizadasen el yacimiento paleontológico pleistocénico. *Antiquitas,*16: 5-26.

Ronchitelli, A., P. Boscato, F. Masini, D. Petruso, G. Surdi, C. A. Accorsi, and P. Torri. 2008. The Grotta Grande of Scario (Salerno, Italy): a spot on the archaeology and the environment during the last interglacial (IOS 5) of the Mediterranean region. *In* Atti Convegno Internazionale INQUA-SEQS (Subcommission on European Quaternary Stratigraphy) Differences and similarities in Quaternary Stratigraphy between Atlantic and continental Europe, 1: 46-47. Centre de Recherche en Archèologie, Archéoscience, Histoire, Rennes.

Rosado-Méndez, N.Y., Lloveras, L., Daura, J., Nadal, J. and Sanz, M. 2015. Predator agents and leporid accumulations: the case of Terrasses de la Riera dels Canyars (Gavà, Barcelona, Spain). *Journal of Archaeological Method and Theory*, 22: 980-1005.

Rouquette, J. 1968. Grotte de Peyre. *Procès-Verbaux des séances de la Société des Lettres, Sciences et Arts de l'Aveyron*, 6: 152-155.

Rouzaud, F., Soulier M., Brugal J.-P., Jaubert J. 1990. L’Igue des Rameaux (Saint-Antonin Noble-Val, Tarn et Garonne). Un nouveau gisement du Pléistocène moyen. Premiers résultats. *Paleo*, 2: 89-106.

Sala, N., Arsuaga, J.L., Laplana, C., Ruiz, B., Gil, M.J., García, N., Aranburu, A. and Algaba, M. 2011. Un paisaje de la Meseta durante el Pleistoceno Superior. Aspectos paleontológicos de la Cueva de la Zarzamora (Segovia, España). *Boletín Real Sociedad Española de Historia Natural, Sección Geológica*, 105: 67–85.

Sanchis, A., Real, C., Sauqué, V., Núñez-Lahuerta, C., Égüez, N., Tormo, C., Ripoll, M.P., Marco, Y.C., Duarte, E. and de la Rasilla, M. 2018. Neanderthal and carnivore activities at Llonin Cave, Asturias, northern Iberian Peninsula: Faunal study of Mousterian levels (MIS 3). *Comptes Rendus Palevol*. <https://doi.org/10.1016/j.crpv.2018.06.001>

Santucci, V.L., Kenworthy J.P. and Kerbo, R. 2001. An inventory of paleontological resources associated with National Park Service caves. *National Park Service Geologic Resources Division Technical Report* NPS/ NRGRD/GRDTR-01/02, 62 p.

Sanz, M. and Daura, J. 2018. Carnivore involvement in bone assemblages based on taphonomic and zooarchaeological analyses of Cova del Coll Verdaguer site (Barcelona, Iberian Peninsula). *Historical Biology*, 30: 807-820.

Sanz, M., Daura, J., Égüez, N. and Brugal, J.P. 2016. Not only hyenids: a multi-scale analysis of Upper Pleistocene carnivore coprolites in Cova del Coll Verdaguer (NE Iberian Peninsula). *Palaeogeography, Palaeoclimatology, Palaeoecology*, 443: 249-262.

Sauqué, V., Rabal-Garcés, R., Madurell-Malaperia, J., Gisbert, M., Zamora, S., de Torres, T., Ortiz, J. E. and Cuenca-Bescós, G. 2017. Pleistocene cave hyenas in the Iberian Peninsula: New insights from Los Aprendices cave (Moncayo, Zaragoza). *Palaeontologia Electronica* 20.1.11A: 1-38 palaeo-electronica.org/content/2017/1786-crocuta-spelaea-in-iberias.

Scharff, R. F., Seymouk, H. J. and Newton, E. T. 1918. The exploration of Castlepook Cave, County Cork: Being the Third Report from the committee appointed to explore Irish Caves. *Proceedings of the Royal Irish Academy, Section B*, 34: 33-72.

Schreve, D.C. 2006. The taphonomy of a Middle Devensian (MIS 3) vertebrate assemblage from Lynford, Norfolk, UK, and its implications for Middle Palaeolithic subsistence strategies. *Journal of Quaternary Science,* 21: 543-556.

Schreve, D. C., Brothwell, D. R. and Stuart, A. J. 2012. The vertebrate assemblage from Lynford: taphonomy, biostratigraphy and implications for Middle Palaeolithic subsistence strategies. *In* Boismier, W. A., Gamble, C. and Coward, F. (eds.), Neanderthals among mammoths: Excavations at Lynford Quarry, Norfolk: Swindon, English Heritage, 157-204.

Schulting, R.J., Trinkaus, E., Higham, T., Hedges, R., Richards, M. and Cardy, B. 2005. A mid-upper Palaeolithic human humerus from Eel Point, South Wales, UK. *Journal of Human Evolution*, 48: 493-505.

Scott, L. 1987. Pollen analysis of hyena coprolites and sediments from Equus Cave, Taung, Southern Kalahari (South Africa). *Quaternary Research*, 28: 144-156.

Scott, L. 1995. Pollen evidence for vegetational and climate change during the Neogene and Quaternary in southern Africa. *In* Vrba, E.S., Denton G., Partridge T.C. and Burckle L.H. (eds.), Paleoclimate and Evolution with Emphasis on Human Origins. New Haven, Yale University Press, 65-76.

Scott, L. and Brink, J.S. 1992. Quaternary palaeoenvironments of pans in central South Africa: palynological and palentological evidence. *South African Geographer*, 19: 22–34.

Scott, L., Fernández-Jalvo, Y., Carrión, J. and Brink, J., 2003. Preservation and interpretation of pollen in hyaena coprolites: Taphonomic observations from Spain and southern Africa. Palaeont. Africana, 39: 83–91.

Sesé, C., and Villa, P. 2008. Micromammals (rodents and insectivores) from the early Late Pleistocene cave site of Bois Roche (Charente, France): systematics and paleoclimatology. *Geobios*, 41: 399–414.

Singer, R. and Wymer, J. 1968. Archaeological investigations at the Saldanha skull site in South Africa. *South African Archaeological Bulletin,* 25: 63–64.

Smith, G.M., 2012. Middle Palaeolithic subsistence: the role of hominins at Lynford, Norfolk, UK. *Quaternary International*, 252:68-81.

Spaulding, W.G. and Martin, P.S. 1979. Ground sloth dung of the Guadalupe Mountains. *In* Genowys, H. H. and Baker, R. J. (eds.), Biological Investigations in the Guadalupe Mountains National Park, Texas. *National Park Service, Proceedings and Transactions Series,* 4: 259-269.

Speth, J. D. and Tchernov, E. 1998. The role of hunting and scavenging in Neandertal procurement strategies: New evidence from Kebara Cave (Israel). *In* Akazawa, T., Aoki, K. and Bar-Yosef, O. (eds.), Neandertals and modern humans in Western Asia. Kluwer Academic Publishers, New York, 223-240.

Steele, T.E. 2012. Late Pleistocene human subsistence in northern Africa: The state of our knowledge and placement in a continental context. *In* Hublin, J.-J. and McPherron, S. P. (eds.), Modern origins: A North African perspective, vertebrate Ppleobiology and paleoanthropology. Springer, Dordrecht, 107-125.

Steele, T.E. and Klein, R.G. 2013. The Middle and Later Stone Age faunal remains from Diepkloof Rock Shelter, Western Cape, South Africa. *Journal of Archaeological Science*, 40: 3453-3462.

Stiner, M.C., Barkai, R. and Gopher, A. 2009. Cooperative hunting and meat sharing 400–200 kya at Qesem Cave, Israel. *Proceedings of the National Academy of Sciences*, 106: 13207-13212.

Stiner, M.C., Gopher, A. and Barkai, R. 2011. Hearth-side socioeconomics, hunting and paleoecology during the late Lower Paleolithic at Qesem Cave, Israel. *Journal of Human Evolution*, 60: 213-233.

# Stimpson, C.M., Lister, A., Parton, A., Clark-Balzan, L., Breeze, P.S., Drake, N.A., Groucutt, H.S., Jennings, R., Scerri, E.M., White, T.S. and Zahir, M. 2016. Middle Pleistocene vertebrate fossils from the Nefud Desert, Saudi Arabia: implications for biogeography and palaeoecology. *Quaternary Science Reviews*, 143: 13-36.

Straus, L. G., González Morales, M.R., Gutiérrez Zugasti, F.I. and Iriarte Chiapusso, M.J. 2011. Further Solutrean evidence in El Mirón Cave (Ramales de la Victoria, Cantabria). *MUNIBE (Antropologia-Arkeologia)*, 62: 117-133.

# Stringer, C., 1977. Evidence of climatic change and human occupation during the Last Interglacial at Bacon Hole cave, Gower. *Gower*, 28: 36-44.

Stuart, A.J. 1996. Vertebrate faunas from the early Middle Pleistocene of East Anglia. *In* Turner, C. (ed.), The Early Middle Pleistocene in Europe: Proceedings of the SEQS Cromer Symposium. Balkema, Rotterdam, 9-24.

Stuart, A.J. and Larkin, N.R. 2010. Taphonomy of the West Runton mammoth. *Quaternary International*, 228: 217-232.

Stynder, D. D., Moggi-Cecchi, J., Berger, L. R. and J.E. Parkington, J.E. 2001. Human mandibular incisors from the late Middle Pleistocene locality of Hoedjiespunt 1, South Africa. *Journal of Human Evolution,* 41: 369–383.

Talamo, S., Blasco, R., Rivals, F., Picin, A., Chacón, M.G., Iriarte, E., López-García, J.M., Blain, H.A., Arilla, M., Rufà, A., Sánchez-Hernández, C., Andrés, M., Camarós, E., Ballesteros, A., Cebrià, A., Rosell, J. and Hublin, J.-J. 2016. The radiocarbon approach to Neanderthals in a carnivore den site: A well-defined chronology for Teixoneres Cave (Moia, Barcelona, Spain). *Radiocarbon*, 58: 247-265.

Tappen, M. 2013. A taphonomic view of site formation and interactions between early *Homo* and the mammals from Dmanisi. *In* Bruch, A. A. and Lordkipanidze, D. (eds.), The Role of the Southern Caucasus on Early Human Evolution and Expansion: Refuge: Hub or Source Area?. Tblisi, Georgian National Museum, 55-56.

Tappen, M., Adler, D.S., Ferring, C.R., Gabunia, M., Vekua, A. and Swisher III, C.C. 2002. Akhalkalaki: The taphonomy of an Early Pleistocene locality in the Republic of Georgia. *Journal of Archaeological Science*, 29: 1367-1391.

Taru, P. 2016. Fossil hair in brown hyaena (Parahyaena brunnea) coprolites from Middle Pleistocene deposits at Gladysvale Cave, South Africa. *Palaeobiodiversity and Palaeoenvironments*, 96: 333-337.

Taru, P. and Backwell, L. 2013. Identification of fossil hairs in Parahyaena brunnea coprolites from Middle Pleistocene deposits at Gladysvale cave, South Africa. *Journal of Archaeological Science*, 40: 3674-3685.

Thompson, R. S., Van Devender, T. R., Martin, P. S., Foppe, T. and Long, A. 1980. Shasta ground sloth (*Nothrotheriops shastense* Hoffstetter) at Shelter Cave, New Mexico: Environment, diet, and extinction. *Quaternary Research*, 14: 360-376.

Tortosa, J.A., Pardo, J.J., Ripoll, M.P., Garcı́a, M.R., Garcı́a, E.B. and Calatayud, P.G. 2002. The far south: the Pleistocene–Holocene transition in Nerja Cave (Andalucıa, Spain). *Quaternary International*, 93:19-30.

Tournepiche, J.F. and Couture, C. 1999. The hyena den of Rochelot Cave (Charente, France): *Monographien des Römisch-Germanischen Zentralmuseums*, 42: 89-101.

Tratman, E. K., Donovan, D. T., and Campbell, J. B. 1971. The Hyaena Den (Wookey Hole), Mendip Hills, Somerset. *Proceedings of the University of Bristol Spelaeological Society*, 12: 245–279.

Trinkaus, E., Biglari, F., Mashkour, M., Monchot, H., Reyss, J.L., Rougier, H., Heydari, S. and Abdi, K. 2008. Late Pleistocene human remains from Wezmeh cave, western Iran. *American Journal of Physical Anthropology,* 135: 371-378.

Turner II, C.G. 2010. The Russian-AmericanPperimortem Taphonomy Project in Siberia: A tribute To Nicolai Dmitrievich Ovodov, pioneering Siberian vertebrate paleontologist and cave archaeologist. *Alaska Journal of Anthropology*, 8: 87-105

Turner II, C.G., Ovodov, N.D. and Pavlova, O.V. 2013. Animal teeth and human tools: a taphonomic odyssey in Ice Age Siberia. Cambridge, Cambridge University Press, 489 p.

Unger F. 1838. Geognostische Bemerkungen über die Badelhöhle bei Peggau. *Steyermärkische Zeitschrift Neue Folge,* 5: 5–16.

# Val, A., Taru, P. and Steininger, C. 2014. New taphonomic analysis of large-bodied primate assemblage from Cooper's D, Bloubank Valley, South Africa. *The South African Archaeological Bulletin*, 69: 49-58.

Valente, M.J. 2004. Humans and carnivores in the early upper Paleolithic in Portugal: data from Pego do Diabo cave. *Revue de Paléobiologie*, 23: 611-626.

van der Made, J. and Dimitrijević, V. 2015. Eucladoceros montenegrensis n. sp. and other Cervidae from the Lower Pleistocene of Trlica (Montenegro). *Quaternary International*, 389: 90-118.

# Van Zinderen Bakker, E.M. 1989. Middle stone age palaeoenvironments at Florisbad (South Africa). *Palaeoecology of Africa*, 20: 133-154.

Van Zyl, W., Brink, J.S. and Badenhorst, S. 2016. Pleistocene Bovidae from X Cave on Bolt's Farm in the Cradle of Humankind in South Africa. *Annals of the Ditsong National Museum of Natural History*, 6: 39-73.

Vekua, A. 1995 Die Wirbeltierfauna der Villafranchien von Dmanisi (Georgien, Kaukasus) und ihre biostratigraphische Bedeutung. *Jahrbuch Römisch-Ger Zent mus Mainz,* 42:77–80.

Velázquez, N.J., Burry, L.S. and Fugassa, M.H. 2015. Palynological analysis of extinct herbivore dung from Patagonia, Argentina. *Quaternary International*, 377: 140-147.

Villa, P., and Bartram, L. 1996. Flaked bone from a hyena den. *Paléo, Revue d'Archéologie Préhistorique*, 8: 143-159.

Villa, P., Castel, J.-C., Beauval, C., Bourdillat, V. and Goldberg, P. 2004. Human and carnivore sites in the European Middle Palaeolithic: Similarities and differences in the bone modiﬁcation and fragmentation. *Revue de Paléobiologie, Genève*, 23:705–730.

Villa, P., Goni, M.F.S., Bescós, G.C., Grün, R., Ajas, A., Pimienta, J.C.G. and Lees, W. 2010. The archaeology and paleoenvironment of an Upper Pleistocene hyena den: an integrated approach. *Journal of Archaeological Science*, 37: 919-935.

Villaluenga, A., Arrizabalaga, A. and Rios-Garaizar, J. 2012. Multidisciplinary Approach to two Chatelperronian Series: Lower IX Layer of Labeko Koba and X Level of Ekain (Basque Country, Spain) Journal of Taphonomy. *Journal of Taphonomy*, 10: 499-520.

Villaverde V, Guillem P, Martínez R, Eixea A. 2014. Cova Negra. *In* Carbonell, E, Bermúdez de Castro, J.M. and, Arsuaga, J.L. (eds.), Los cazadores recolectores del Pleistoceno y del Holoceno en Iberia y el Estrecho de Gibraltar Fundación Atapuerca. Burgos, Universidad de Burgos, 361–369.

Vivent, D. 1989. Analyses polliniques de coprolithes d'hyènes de deux sites paléolithiques d'Auvergne (Saint-Hippolyte, Puy-de-Dôme et Châtelperron, Allier). *Revue archéologique du Centre de la France*, 28: 229-235.

Vallverdú-Poch, J., de Soler, B.G., Vaquero, M. and Bischoff, J.L. 2012. The Abric Romaní site and the Capellades region. *In* Carbonell i Roura, E (ed.), High Resolution Archaeology and Neanderthal Behavior. Springer, Dordrecht, 19-46.

Vallverdú, J., Saladié, P., Rosas, A., Huguet, R., Cáceres, I., Pineda, A., Ollé, A., Mosquera, M., Garcia-Tabernero, A., Estalrrich, A. and Carrancho, Á. 2014. El Barranc de la Boella (La Canonja, Tarragona, Catalonia, Spain). In Sala, R. (ed.), Pleistocene and Holocene Hunter-Gatherers in Iberia and the Gibraltar Strait: the Current Archaeological Record. Universidad de Burgos, Burgos, 287-295.

Wang, Q. and Sun, L. 2000. Eightieth year of Peking Man: Current status of Peking Man the Zhoukoudian site. *Przegląd Antropologiczny Anthropological Review*, 63: 19-30.

Wang W, Wu Y, Song G, Zhao K, Li Z. 2014. Pollen and fungi spore analysis on hyaenid coprolite from the Xuchang Man Site, Central China. *China Science Bulletin,* 58: 51–56.

Wang W, Li Z, Song G, Wu Y. 2015. A study of possible hyaena coprolites from the Lingjing Site, Central China. *Acta Anthropologica Sinica*, 34: 117–125.

Williams, J., Andrews, P., García-Morato, S., Villa, P. and Fernández-Jalvo, Y. 2018. Hyena as a predator of small mammals? Taphonomic analysis from the site of Bois Roche, France. *Paleobiology*, 44(3), 2018, pp. 511–529 DOI: 10.1017/pab.2018.13

White, M.J. and Pettitt, P.B. 2011. The British Late Middle Palaeolithic: an interpretative synthesis of Neanderthal occupation at the northwestern edge of the Pleistocene world. *Journal of World Prehistory*, 24: 25-97.

White, T.D. and Toth, N. 1991. The question of ritual cannibalism at Grotta Guattari. *Current Anthropology*, 32:118-124.

Yll, R., Carrión, J.S., Marra, A.C. and Bonfiglio, L. 2006. Vegetation reconstruction on the basis of pollen in Late Pleistocene hyena coprolites from San Teodoro Cave (Sicily, Italy). *Palaeogeography, Palaeoclimatology, Palaeoecology*, 237: 32-39.

Ziegler, R. 1994. Das Mammut (*Mammuthus primigenius* Blumenbach) von Siegsdorf bei Traunstein (Bayern) und seine Begleitfauna. *Münchner Geowissenschaftiche Abhandlungen A Geologie und Paläontologie*, 26: 49-80.

Zilhao, J. 2001. Middle Palaeolithic settlement patterns in Portugal. *In* Conard, D. (ed.), Settlement dynamics of the Middle Palaeolithic and Middle Stone Age. Kerns Verlag, Tübingen, 597-608.

Zilhão, J. D., Angelucci, J. A., Brugal, J.-P., Carrión, J. S., Carvalho, R., Fuentes, N., Nabais, M. and P. Queiroz, P. 2010. Humans and hyenas in the Middle Paleolithic of Gruta da Oliveira (Almonda karstic system, Torres Novas, Portugal). *1a Reunión de científicos sobre cubiles de hiena (y otros grandes carnívoros) en los yacimientos arqueológicos de la Península* (2010): 299-308.
